# Supplementary material
Source: PubMed Central journal article supplement (PMC5780248)
Supplement: NIHMS918515-supplement-1.pdf [file NIHMS918515-supplement-1.pdf]

# Intergenerational transfer of antibiotic-perturbed microbiota enhances colitis in susceptible mice

Anjelique F. Schulfer, Thomas Battaglia, Yelina Alvarez, Luc Bijnens, Victoria E. Ruiz, Melody Ho, Serina Robinson, Tonya Ward, Laura M. Cox, Arlin B. Rogers, Dan Knights, R. Balfour Sartor and Martin J. Blaser\*

---

\*Corresponding author, email: [martin.blaser@nyumc.org](mailto:martin.blaser@nyumc.org)

Supplementary text for the manuscript:

## **Intergenerational transfer of antibiotic-perturbed microbiota enhances colitis in susceptible mice**

### Table of Contents

|                                                         |    |
|---------------------------------------------------------|----|
| Supplementary Figures 1-11.....                         | 2  |
| Supplementary Tables 1-12.....                          | 24 |
| Supplementary Notes .....                               | 36 |
| OTU Transfer .....                                      | 36 |
| Metagenomic Pathways.....                               | 36 |
| Microbiota Transfer into IL10 <sup>-/-</sup> Mice ..... | 37 |
| Microbiota Richness and Tissue Injury .....             | 38 |
| Supplementary Discussion .....                          | 39 |
| Microbial Succession .....                              | 39 |
| Antimicrobial Resistance.....                           | 40 |
| Supplementary References .....                          | 41 |

# Supplementary Figures

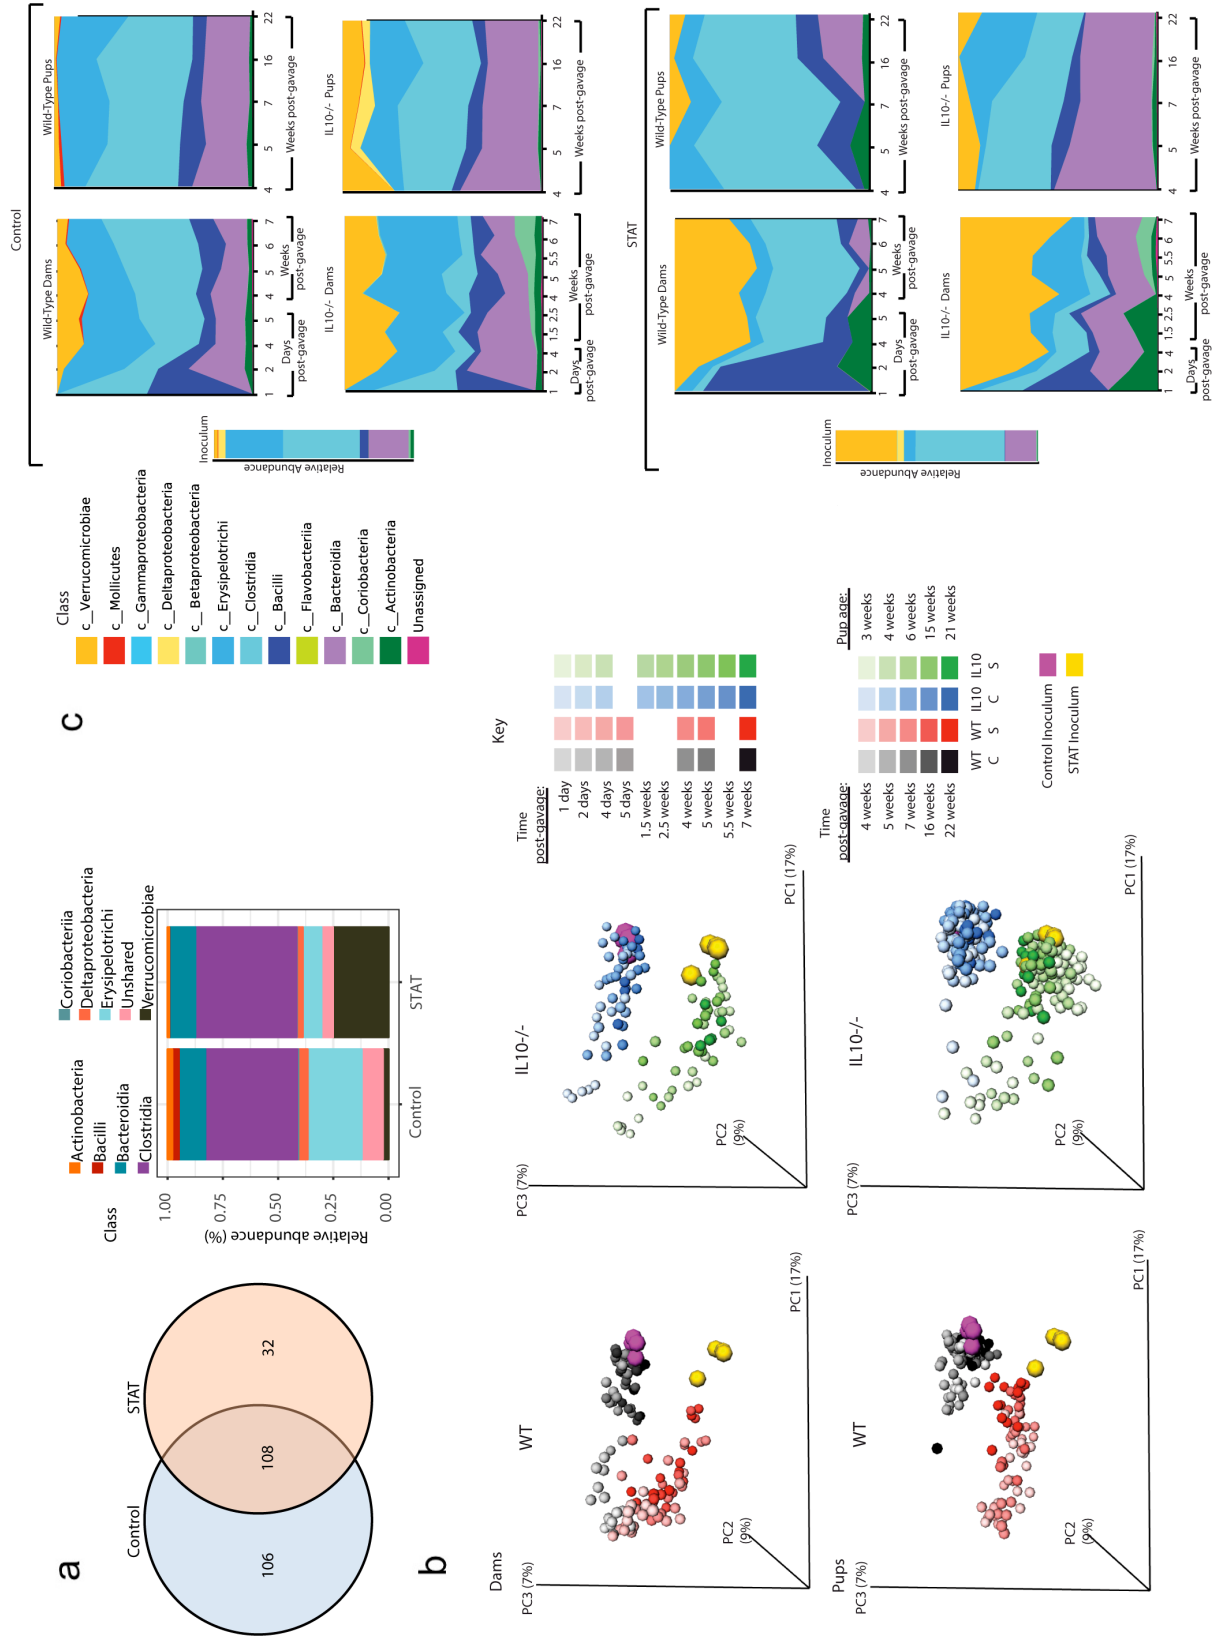

**Supplementary Figure 1. Changes in microbiota and body composition over time.**

**(a)** Analysis of inoculum samples. Left: Venn diagram of number of OTUs identified in Control, STAT, or both inocula. Right: Relative abundance of taxa identified in Control and STAT inocula. Includes analysis of 4 replicate samples of each donor material **(b)** PCoA plots showing progression of fecal bacterial communities along PC1 over time. Rotated view of PCoAs from Figure 1b. Bold, italicized times have samples from the same day for dams and pups. See Supplementary Table 1 for numbers of mice and P values from Adonis testing. **(c)** Taxa summaries showing mean relative abundance of taxa identified in each group over time; numbers of mice are as in Supplementary Table 1. Taxa are shown at the class level, as described in the color legend.

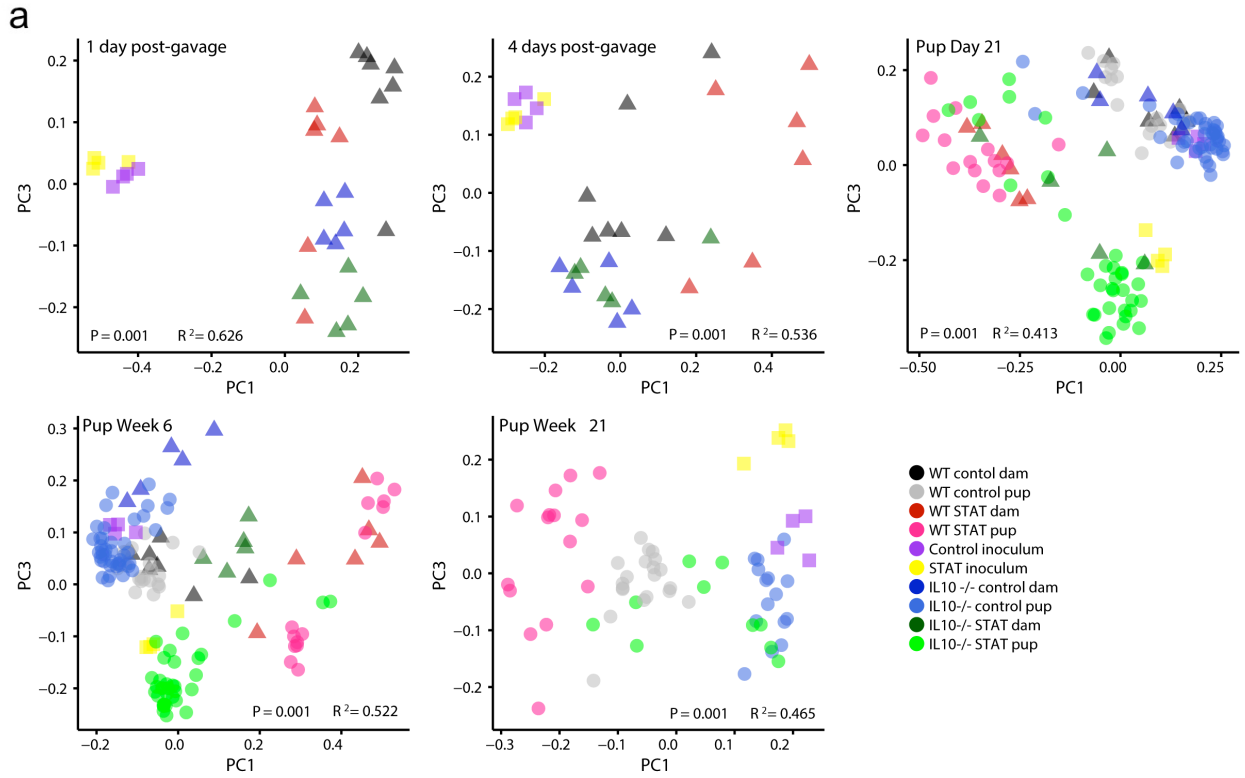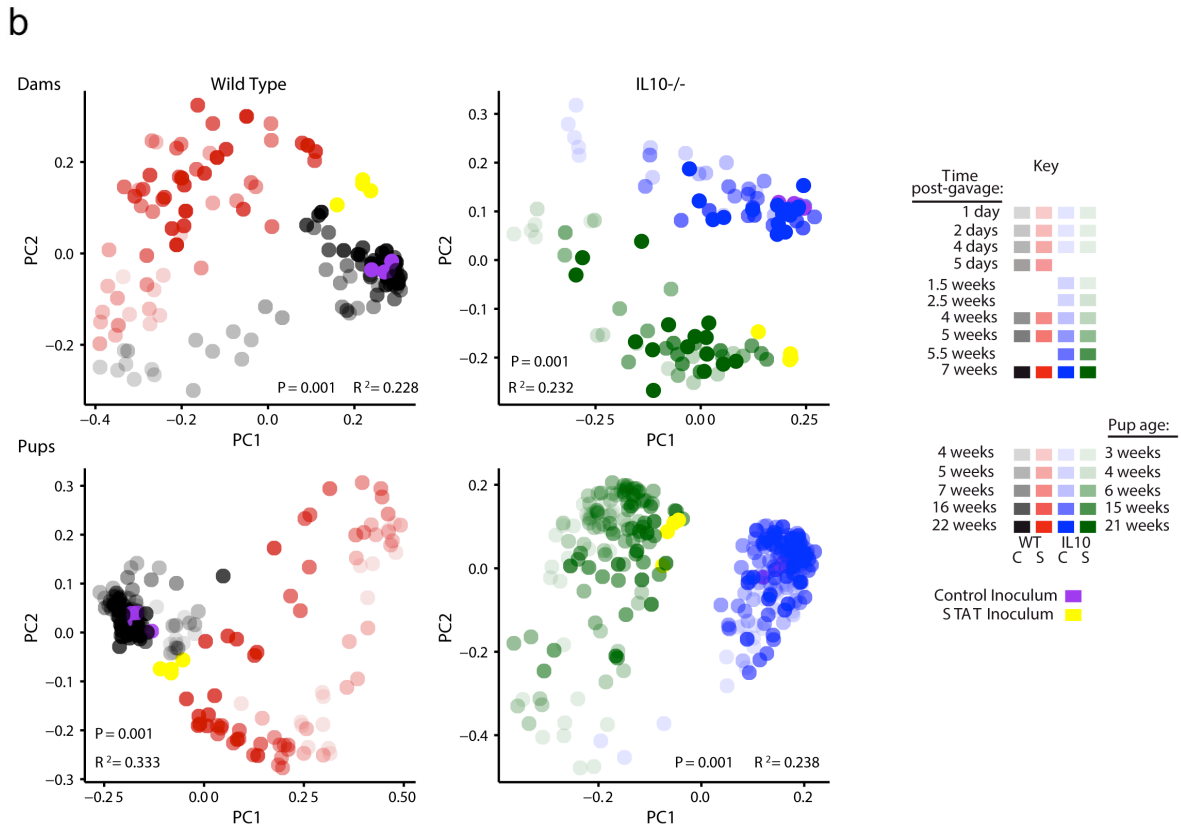

**Supplementary Figure 2. Principal Coordinate analysis showing unweighted**

**UniFrac distances at each of 12 time-points.** For each time point, Adonis testing (PERMANOVA) was performed, testing for differences across genotype/treatment groups, with p-value and  $R^2$  shown. **(a)** Inocula (squares), dams (triangles), pups (circles). **(b)** Circles color-coded by time, and shaded by group. Numbers of mice studied for dams, pups, respectively, in each of the 4 groups are: IL10<sup>-/-</sup> Control =5, 15-42; WT Control=7, 20; IL10<sup>-/-</sup> STAT=5, 10-34; WT STAT =6, 15. Numbers for the IL10 pup groups declined after 6 weeks due to sacrifices.

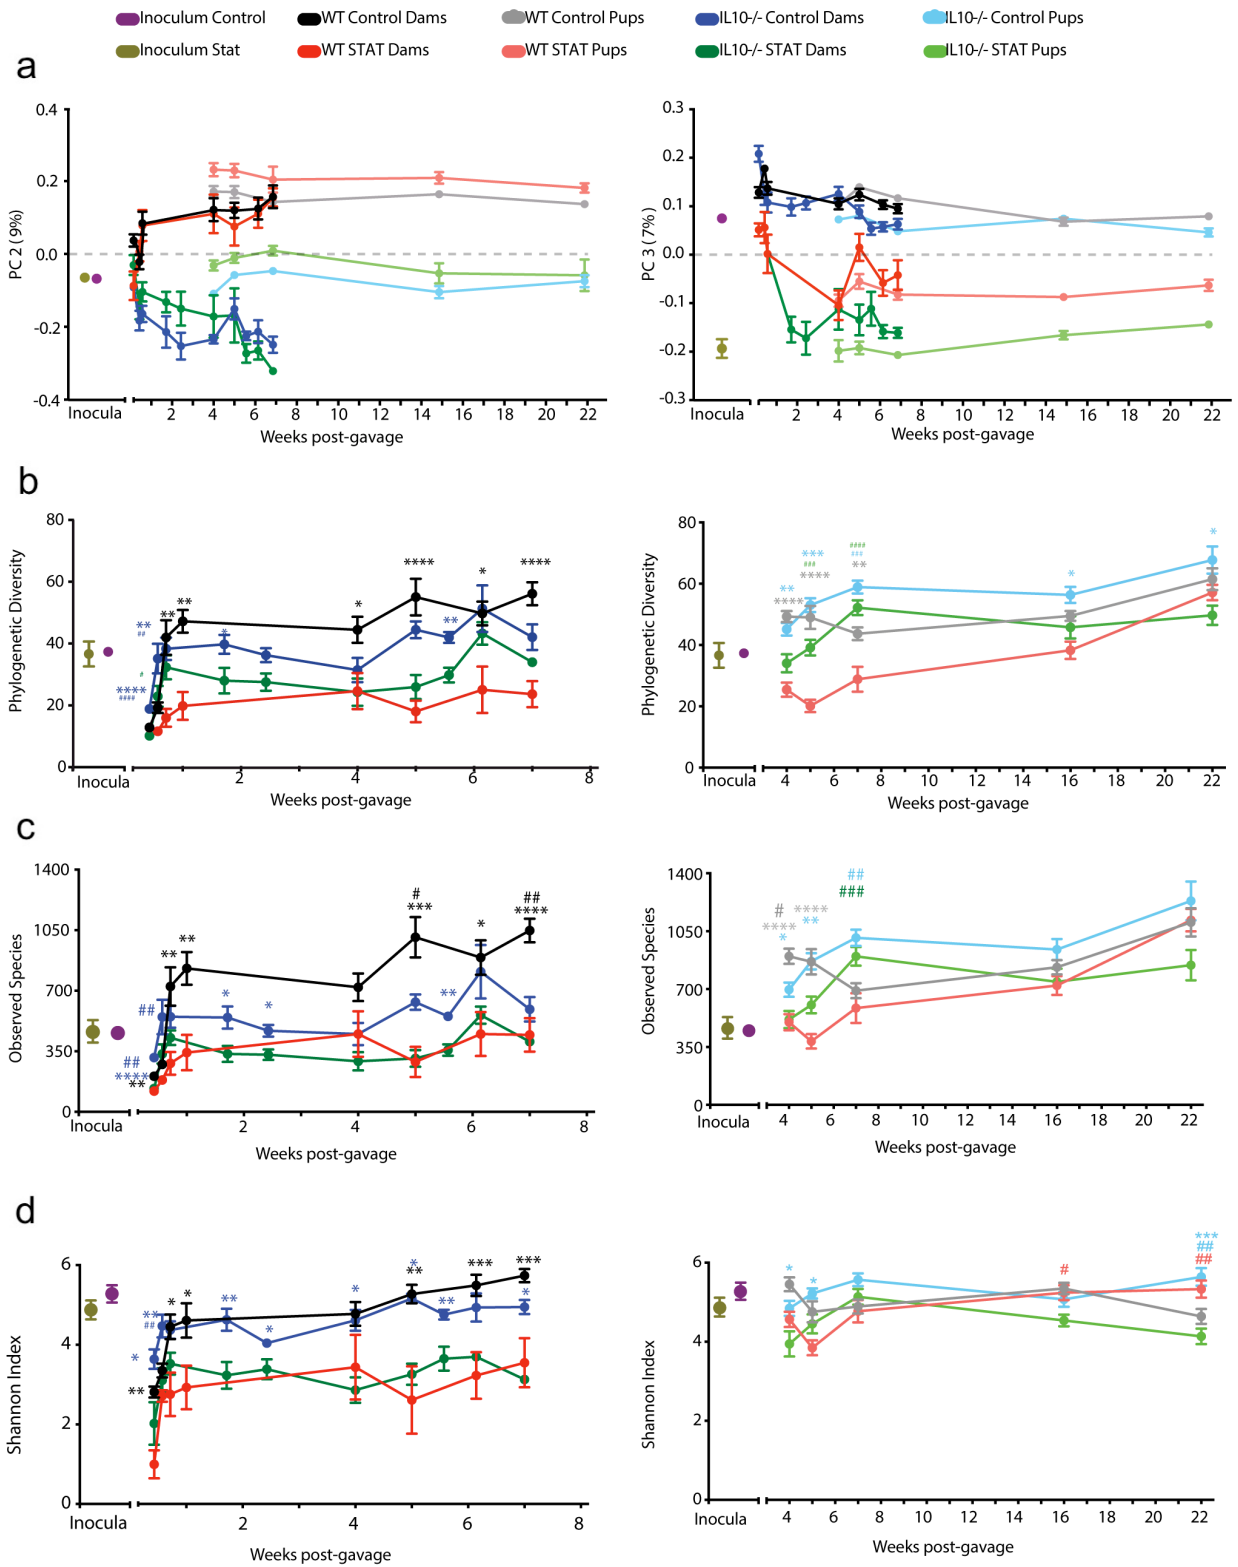

**Supplementary Figure 3. Stable microbiota communities in recipient mice are determined by genotype and antibiotic influence. (a) Beta-diversity from unweighted**

UniFrac principal component values over time. Numbers of mice are as in Supplementary Table 1; plots show mean  $\pm$  SEM for each group. Left, PC2: Control WT vs. Control IL10<sup>-/-</sup> and STAT WT vs. STAT IL10<sup>-/-</sup> are significantly different ( $p < 0.05$ , one-way ANOVA with Sidak's multiple comparison test, see Supplementary Table 2) for time points after day1-post-gavage. Right, PC3: Control WT vs. STAT WT and Control IL10<sup>-/-</sup> vs. STAT IL10<sup>-/-</sup> are significantly different ( $p < 0.05$ , one-way ANOVA with Sidak's multiple comparison test, see Supplementary Table 2) for all timepoints after 1 week post-gavage. Inocula are also significantly different ( $p < 0.05$ , Mann-Whitney test) along PC3. **(b-d)** Alpha diversity: plots indicate mean  $\pm$  SEM. Significance indicated by color (group with higher value) and symbols: \* compares Control and STAT within the same genotype, # compares the same treatment group across genotype. \* $p < 0.05$ , \*\* $p < 0.01$ , \*\*\* $p < 0.001$ , \*\*\*\* $p < 0.0001$ , one-way ANOVA with Sidak's multiple comparison test for all time points, except Mann-Whitney test was used when only two groups were compared, see Supplementary Table 3. **(b)** Phylogenetic Diversity in dams (left) and pups (right). **(c)** Microbial richness (observed species) in dams (left) and pups (right). **(d)** Evenness (Shannon index) over time in dams (left) and pups (right).



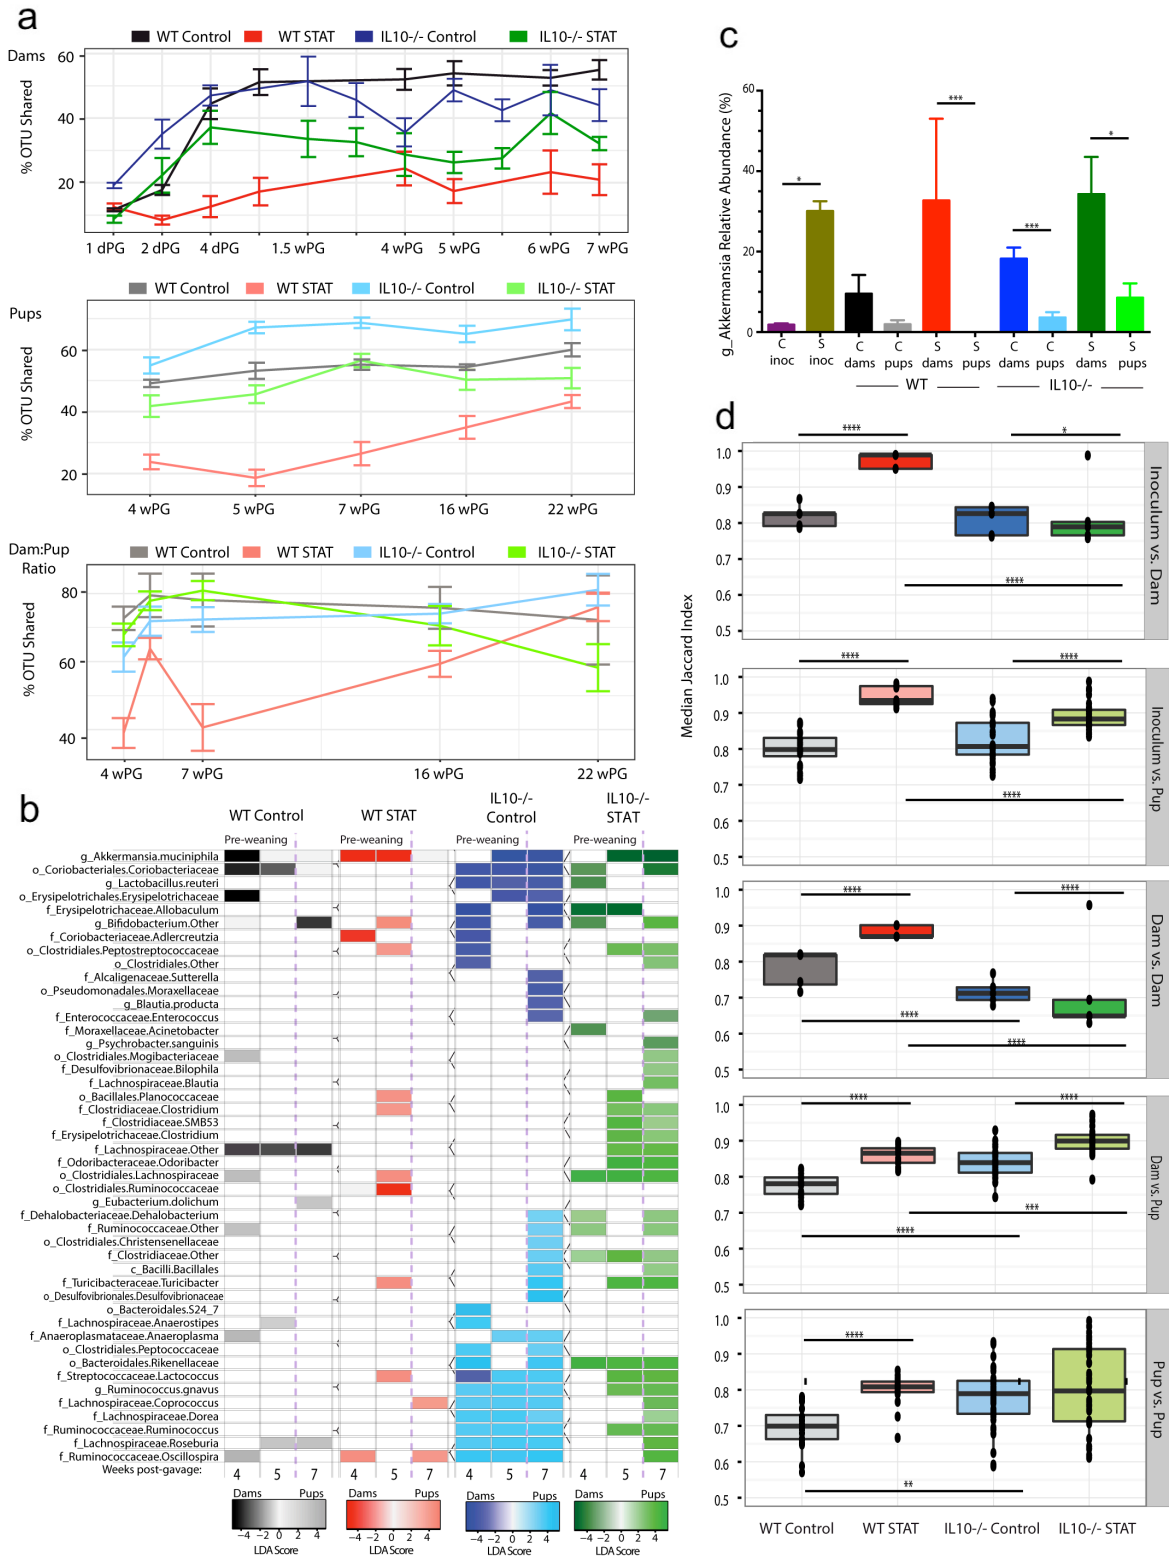

**Supplementary Figure 4. Microbiota stability across transfer and generations. (a-c)** Numbers of mice are as in Supplementary Table 1. **(a)** Percentage of inoculum OTUs

shared by that inoculum and the mouse group that received that inoculum. Mean +/- SEM for each group of dams (top) and pups (middle) over time. Differences that were significant at individual time points include significantly greater shared OTUs in the pups and dams for the Control specimens vs STAT at all time points. IL10<sup>-/-</sup> pups also had a significantly higher proportion of shared inoculum OTUs compared to wild type. Percent OTUs shared were calculated by the number of shared OTUs between a sample and its respective inoculum, divided by the total number of OTUs found within the inoculum. The bottom graph shows sharing of the OTUs of the dams and their pups. Pups were studied from weaning (5 weeks post-gavage) through 22 weeks post-gavage. Mouse numbers are as in Supplementary Figure 2. Statistical significance was determined using the Welch's Two Sample t-test, see Supplementary Table 7 for P-values. **(b)** Linear discriminant analysis (LDA) scores based on the LEfSe analysis for time points with both dam and pup fecal samples, indicating taxa that are significantly different in abundance between dams and their pups. **(c)** Relative abundance of *Akkermansia* at 5 weeks post-gavage, mean +/- SEM. \*p<0.05, \*\*\*p<0.001, Mann-Whitney U-test. See Supplementary Table 8. **(d)** Median Jaccard index values were calculated for each sample's pairwise comparison between the indicated groups (Inoculum vs. dams, dams vs. dams, etc). Boxplots indicate the median values with interquartile range. Treatment groups were compared with a set of pairwise Wilcoxon tests with Holm correction, \* p < 0.05, \*\* p<0.01, \*\*\* p<0.001, \*\*\*\* p<0.0001 see Supplementary Table 9. Numbers of mice studied for dams, pups, respectively, in each of the 4 groups are: IL10<sup>-/-</sup> Control =5, 42; WT Control=7, 20; IL10<sup>-/-</sup> STAT=5, 34; WT STAT =6, 15. Each inoculum was 4 replicate samples.

**a**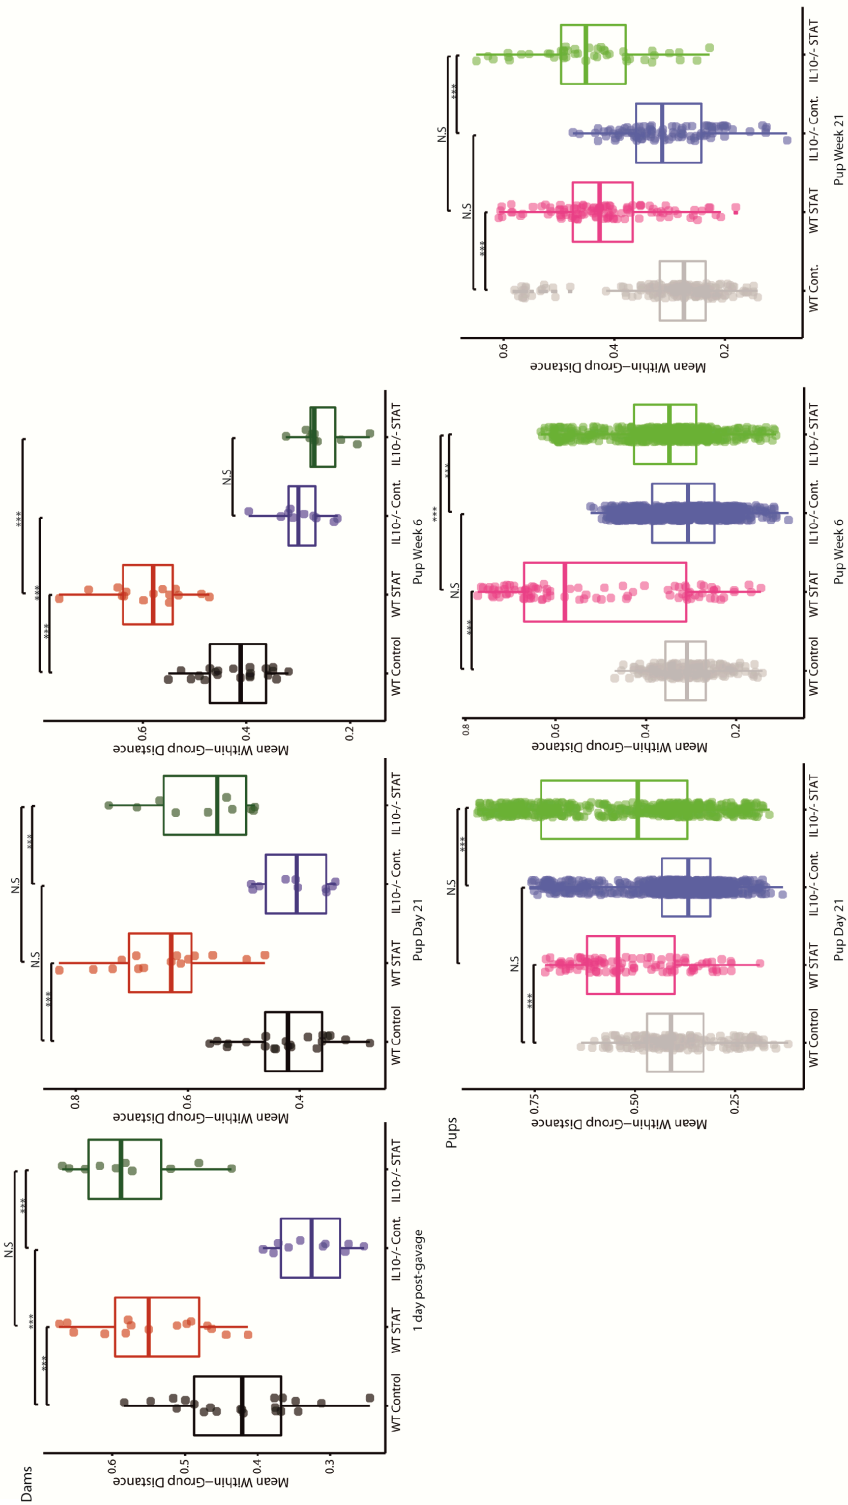**b**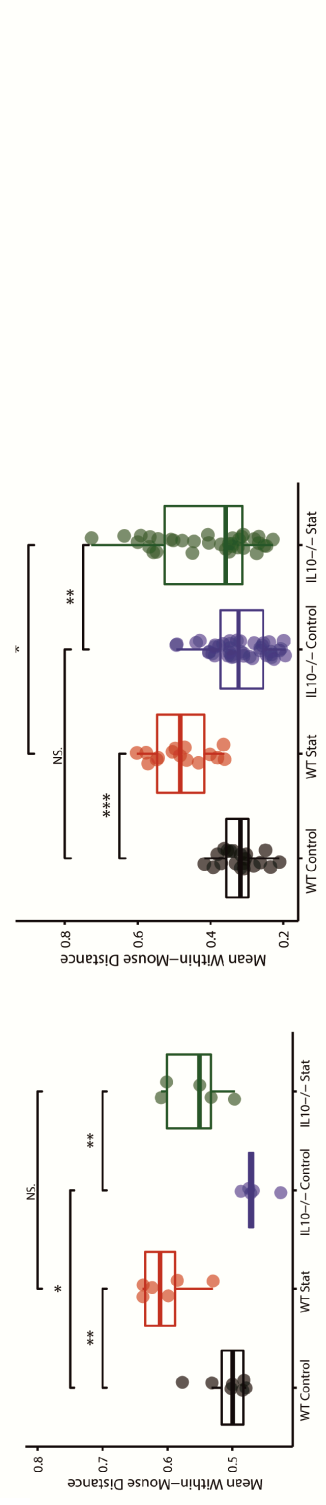

**Supplementary Figure 5. Intra-litter and intra-mouse variation over time. (a)**

Intragroup distances in community composition in dams and their pups according to

genotype and inoculum over time. NS, not significant; p-values <0.05 are shown. **(b)** Mean within-mouse distances (variation), based on unweighted UniFrac analysis. In each comparison, there was significantly more variation in mice receiving the antibiotic-perturbed inoculum than in control (t-tests, with FDR-correction. \* p< 0.05; \*\* p< 0.01; \*\*\*p<0.001; NS, not significant). IL-10<sup>-/-</sup> dams receiving the control inoculum have lower within-mouse variability than wild-type (WT) mice receiving the control inoculum, but this does not hold true for pups. IL10<sup>-/-</sup> pups receiving the STAT inoculum have lower within-mouse variability than wild-type (WT) mice receiving the STAT inoculum, but this does not hold true for dams. Numbers of mice are as detailed in Supplemental Table 1. See Supplementary Table 10 for detailed statistics.

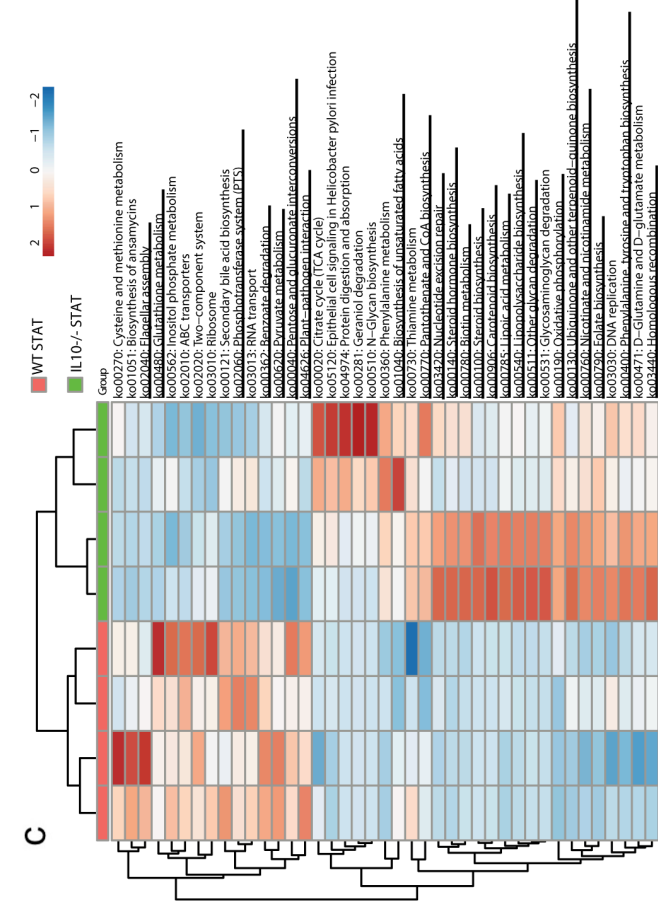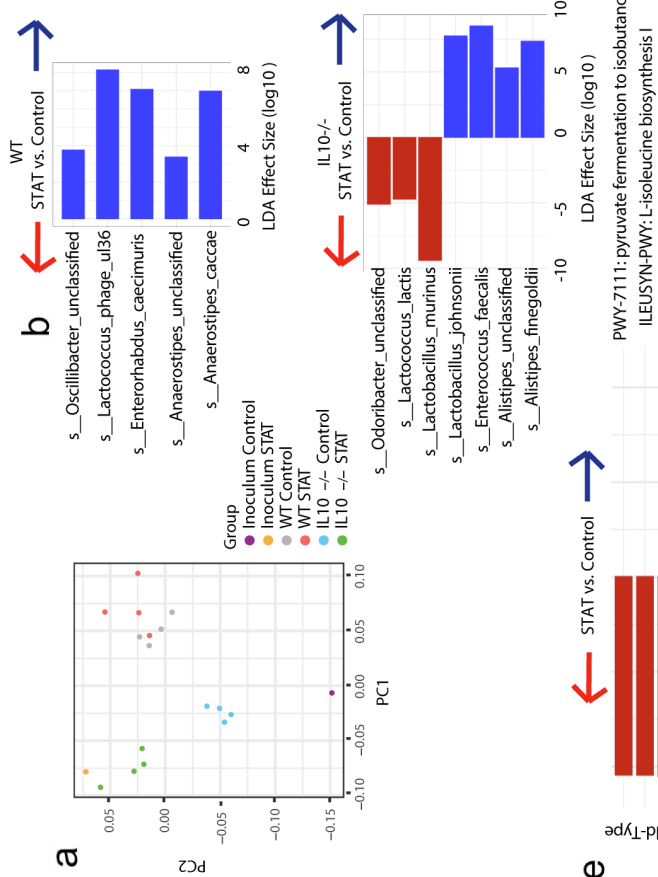

**Supplementary Figure 6. Early-life pup metagenome analysis.** All panels represent whole genome shotgun sequencing analysis of samples from the two inocula and fecal samples from four 3-week-old mice from each of the four groups. **(a)** Principal Coordinates Analysis ordination of the Bray-Cutis Presence/Absence metric based on metagenomic analysis. MetaCyc pathway abundances generated using HUMAnN2. Significance was determined by PERMANOVA,  $P = 0.001$  WT vs. IL10<sup>-/-</sup> (all),  $P = 0.12$  Control vs STAT (WT),  $P = 0.04$  Control vs STAT (IL10<sup>-/-</sup>),  $P = 0.04$  Control vs Control,  $P = 0.03$  STAT vs STAT. **(b)** Taxa abundances were determined using Metaphlan2 and differences compared using LEfSe ( $P < 0.05$ ;  $LDA > 2$ ). Bars represent the Linear Discriminate Analysis (LDA) Effect Size, between Control and STAT pups. Colors correspond to the taxa increased in STAT pups (red), or increased in the Control pups (blue). **(c-d)** KEGG pathway abundances for each sample were calculated using *HUMAnN2* from shotgun metagenomic data. Significance was determined using the LEfSe algorithm ( $P < 0.05$ ,  $LDA > 2$ ). Intensity signifies the scaled row z-score of a pathway across all samples. **(c)** Differential KEGG pathways in WT and IL10<sup>-/-</sup> STAT pups. Pathways that are in bold and underlined had the same expression pattern in the same direction in WT and IL10<sup>-/-</sup> Control pups. **(d)** Differential KEGG pathways in IL10<sup>-/-</sup> Control and STAT pups. Pathways in bold and underlined had the same expression pattern in the same direction in WT Control and STAT pups. **(e)** MetaCyc metabolic pathways differing significantly between Control and STAT in WT and IL10<sup>-/-</sup> pups, using LEfSe. The density of the pathways increased in Control pups are in blue, while pathways increased in STAT pups are in red. Function pathway abundances were generated using the microbial metagenomics function tool, HUMAnN2. ( $P < 0.05$ ;  $LDA > 2$ ) **(f)** Using ShortBRED, the metagenomic data from the samples were queried for antibiotic resistance (AR) gene markers. Abundance is shown as Reads per Kilobase per Million mapped reads (RPKM). Differences between pairs were tested for

significance by a two-sided t-test. None of the groups was significantly different from their respective inoculum. Mean  $\pm$  SD abundance within groups for each AR gene Superclass.

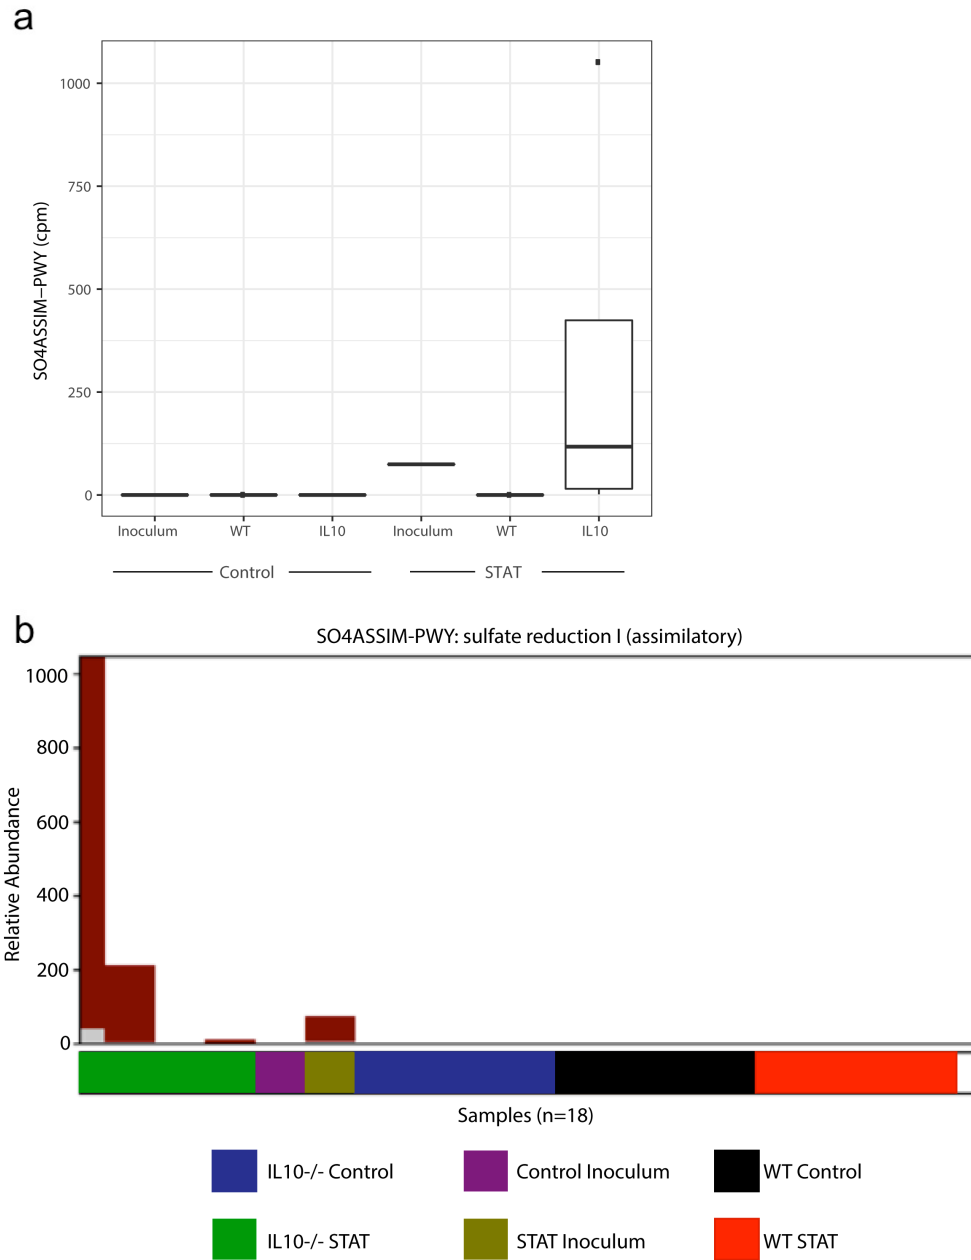

**Supplementary Figure 7. Metabolic pathway analysis. (a)** Abundance of the SO4SSIM metabolic pathway in metagenomic libraries from the two inocula, and from fecal contents from pups (n=4) at three weeks. Data are normalized using the total sum-scaling method of copies per million (cpm). Boxplots show median with interquartile range. The Sulfate Reduction I (SO4SSIM-PWY) Metacyc pathway significance differences in bacterial pathway abundances are shown in **Supplementary Figure 6e**.



**(b)** Relative abundance of taxa contributing the SO<sub>4</sub>ASSIM-pathway: sulfate reduction I, according to source of metagenomic samples. The only classifiable taxon identified by HUMANN2 as contributing genes to this pathway was *Akkermansia mucinophila* (shown in brown) in the STAT inoculum and in three of the four IL10<sup>-/-</sup> STAT pups at 3 weeks of age.

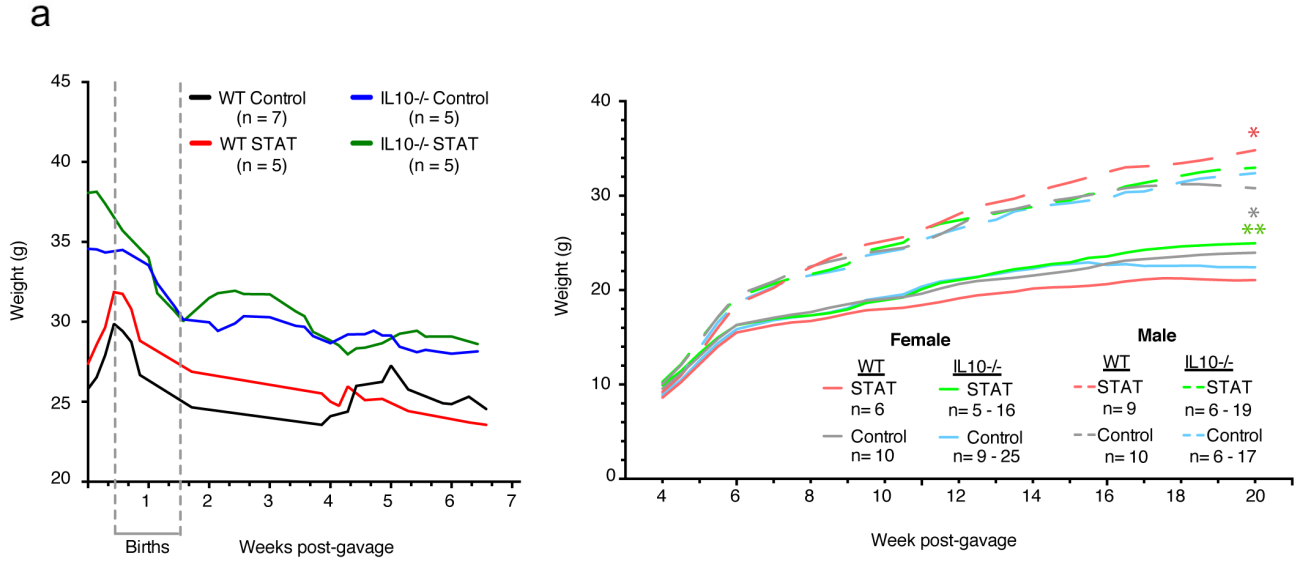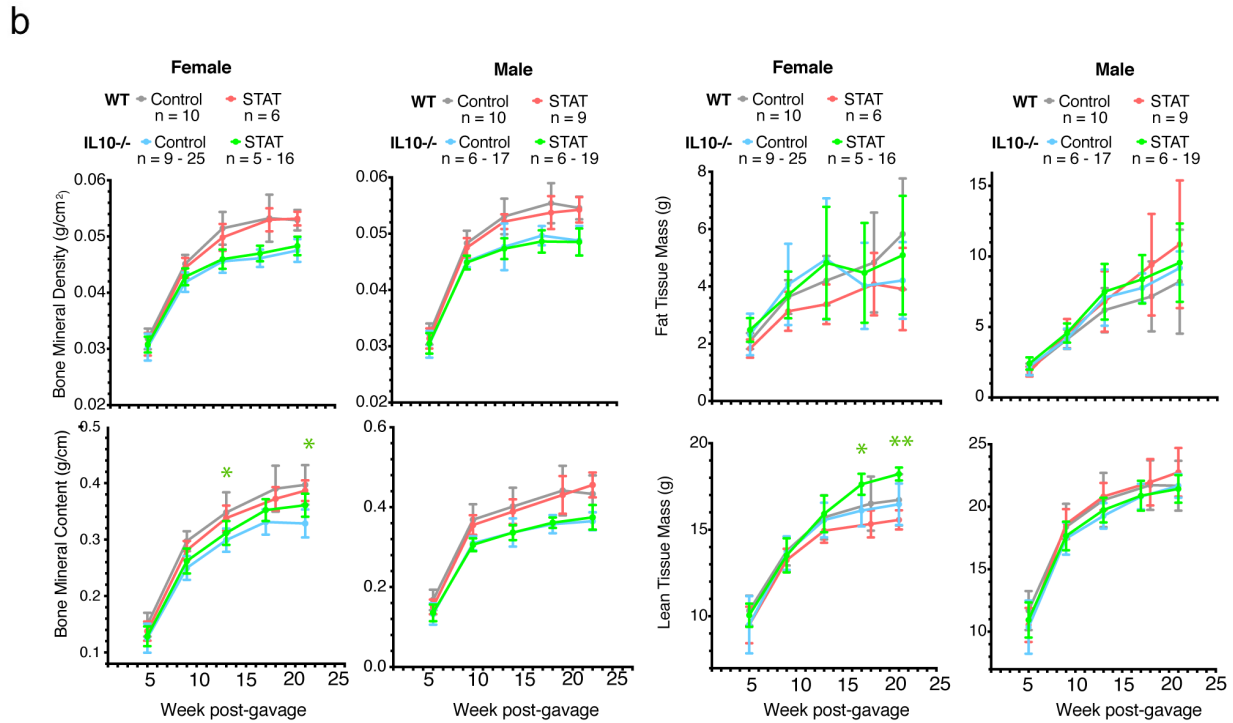

**Supplementary Figure 8. Weight and body composition of dams and pups over**

**time.** (a) Scale weight over time. Group data were smoothed to the second order (3-neighbor method). Dams (left) all gave birth during the window indicated by gray dashed lines. Pups (right) show males and females of all groups. Indicated significance is between IL10<sup>-/-</sup> Control females and IL10<sup>-/-</sup> STAT females. Exact mouse numbers for

IL10<sup>-/-</sup> pups at each time point are listed in Supplementary Table 1. **(b)** DEXA results showing body composition of pups over time. Top row: bone mineral density (g/cm<sup>2</sup>) (left), fat tissue mass (g) (right); bottom row: bone mineral content (g/cm) (left) (indicated significance is between IL10<sup>-/-</sup> Control females and IL10<sup>-/-</sup> STAT females), lean tissue mass (g) (right) (indicated significance is between IL10<sup>-/-</sup> Control females and IL10<sup>-/-</sup> STAT females). Mean +/- SEM for each group. **(a-b)** Mann-Whitney test \* p < 0.05; \*\* p < 0.01, see Supplementary Table 11.

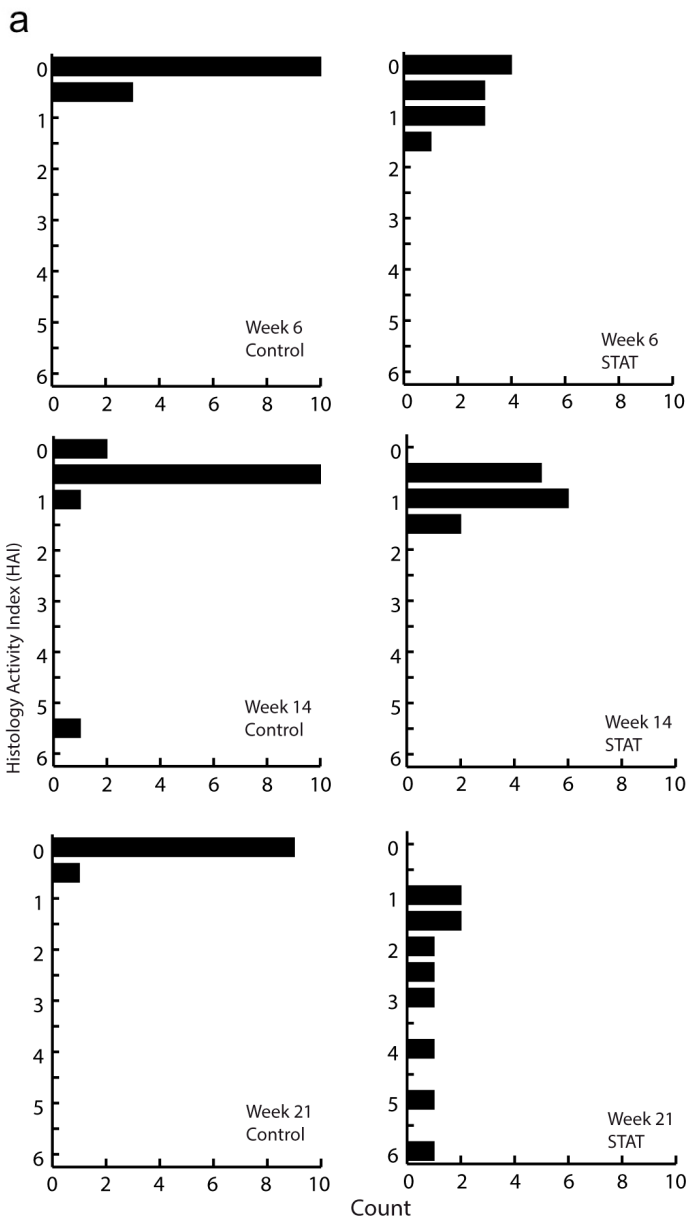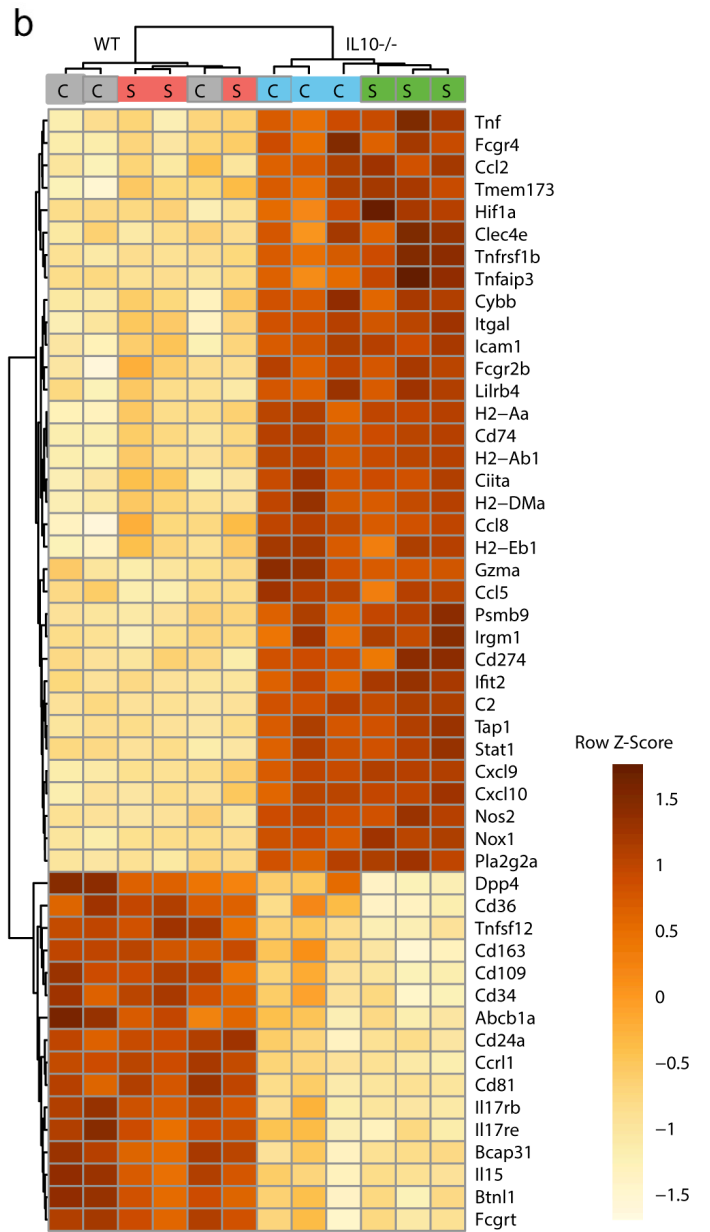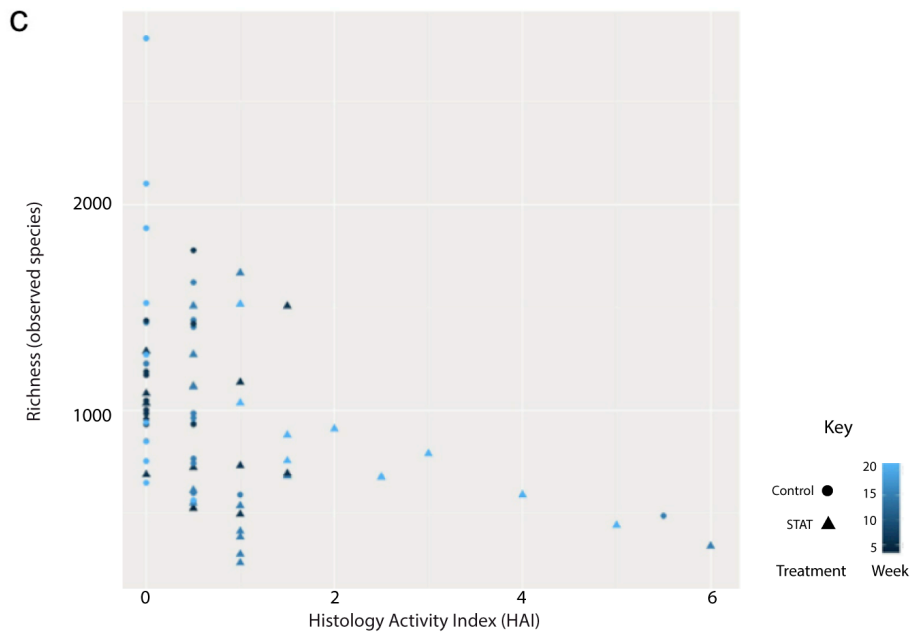

**Supplementary Figure 9. Distribution of histology activity indices in IL10<sup>-/-</sup> pups and differential gene expression in mouse pup colon. (a)** Histology activity indices at weeks 6, 14, and 21 in the IL10<sup>-/-</sup> pups shown by inoculum status. Using these data, a Proportional Odds model was used to fit a common-slopes cumulative model, which is a parallel lines regression model based on the cumulative probabilities of the response categories rather than on their individual probabilities. Based on this model, STAT effects can be represented as the Odds Ratio (OR) of moving to the next level in the disease score of STAT versus Control. This OR was calculated to be 20.5 (CI 6.5 – 64.1). **(b)** The 50 most differential genes (all with FDR-corrected p value <0.05, see Supplementary Table 12.) expressed in the colon of the WT and IL10<sup>-/-</sup> pups according to inoculum status (n = 3 in each of the 4 groups) at week 21, measured by the Nanostring nCounter Mouse Immunology Panel v1. **(c)** Microbial richness, based on observed number of species versus colonic histology score. Scores were obtained at 6, 14, and 21 weeks; a total of 71 mice were included in the analysis; 6 animals with missing data were excluded. The intervals around the ORs represent 95% confidence limits. Figure represents a single experiment. For **(a)** and **(c)**, Control n = 13, 14, 10 and STAT n = 11, 13, 10 at weeks 6, 14, and 21 respectively.

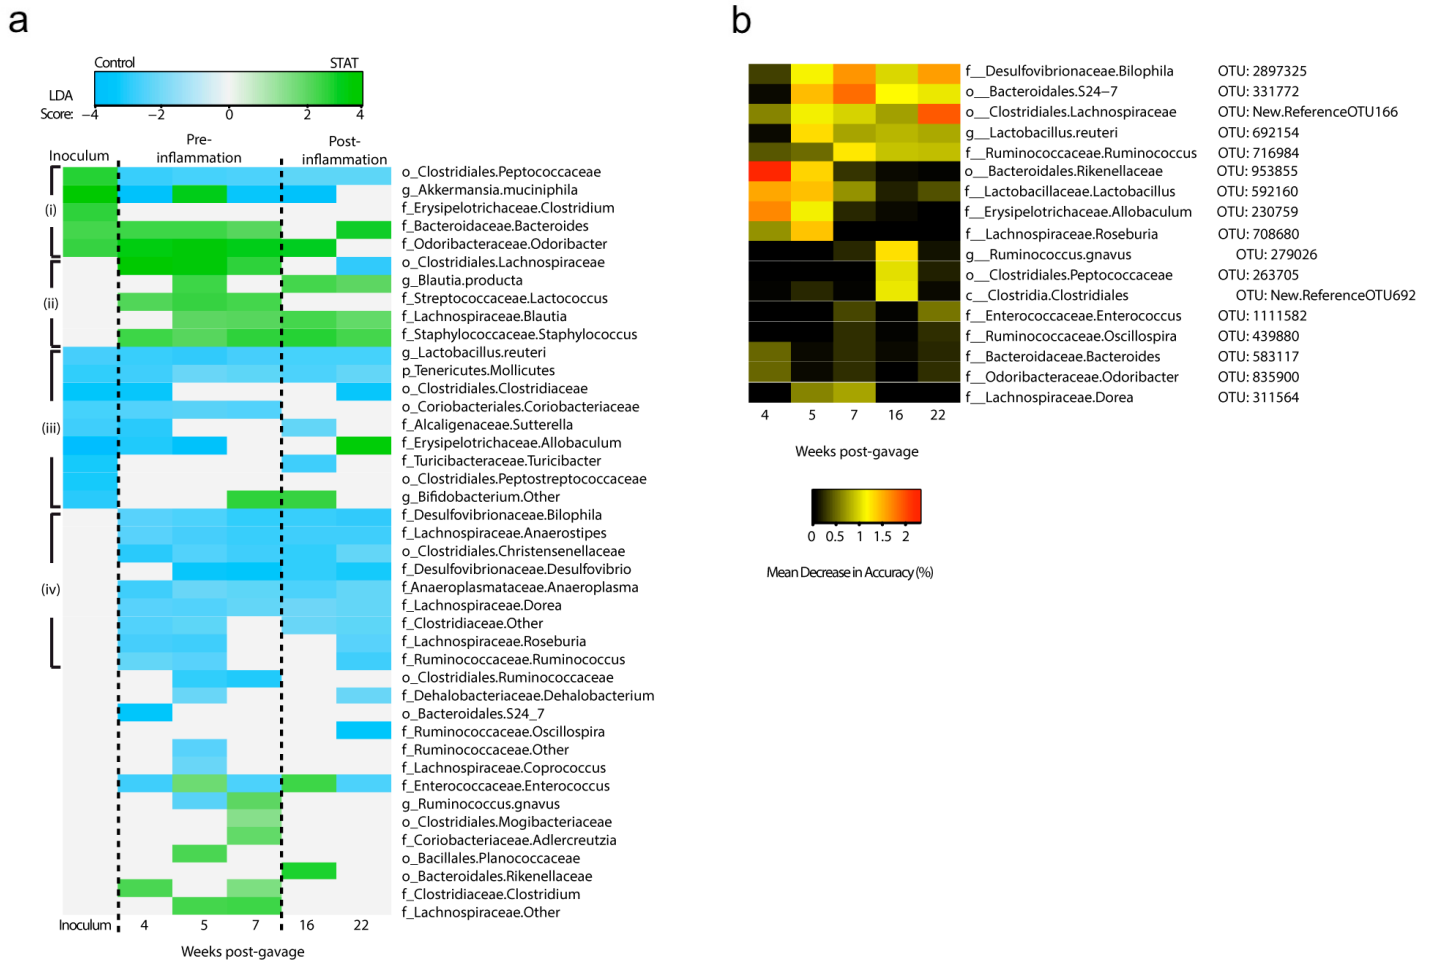

**Supplementary Figure 10. Differential taxa associated with enhanced pathology in**

**IL10<sup>-/-</sup> STAT mice. (a)** Heatmap summary of LfSe results showing taxa that

significantly differentiate Control microbiota and STAT microbiota in IL10<sup>-/-</sup> pups.

Numbers of mice are as in Supplementary Table 1. The leftmost column compares

communities in the inocula while the next five columns compare communities in the

IL10<sup>-/-</sup> pups at different time points. Green indicates taxa that are more abundant in

STAT while blue indicates taxa that are more abundant in Control, according to the LDA

key shown. **(b)** Random Forest modeling results showing the features that are most

predictive of week 21 histology activity index (HAI) at each experimental time point in

IL10<sup>-/-</sup> pups. This model was built from 10 samples in each group (HAI 1+ and HAI <1)

at each time point except for 16 weeks post-gavage where n=10 and 8, respectively and

22 weeks post-gavage where  $n=9$  and  $10$ , respectively. The model error was  $0.050$  at 4 weeks post-gavage,  $0.000$  at 5 weeks post-gavage, 7 weeks post-gavage, and 16 weeks post-gavage (making the error ratio infinite for these time points), and  $0.030$  at 22 weeks post-gavage. Baseline error was  $0.5$  at 4 weeks post-gavage giving an error ratio of  $10.0$ ,  $0.5$  at 5 weeks post-gavage and 7 weeks post-gavage,  $0.444$  at 16 weeks post-gavage, and  $0.474$  at 22 weeks post-gavage with an error ratio of  $15.8$ .

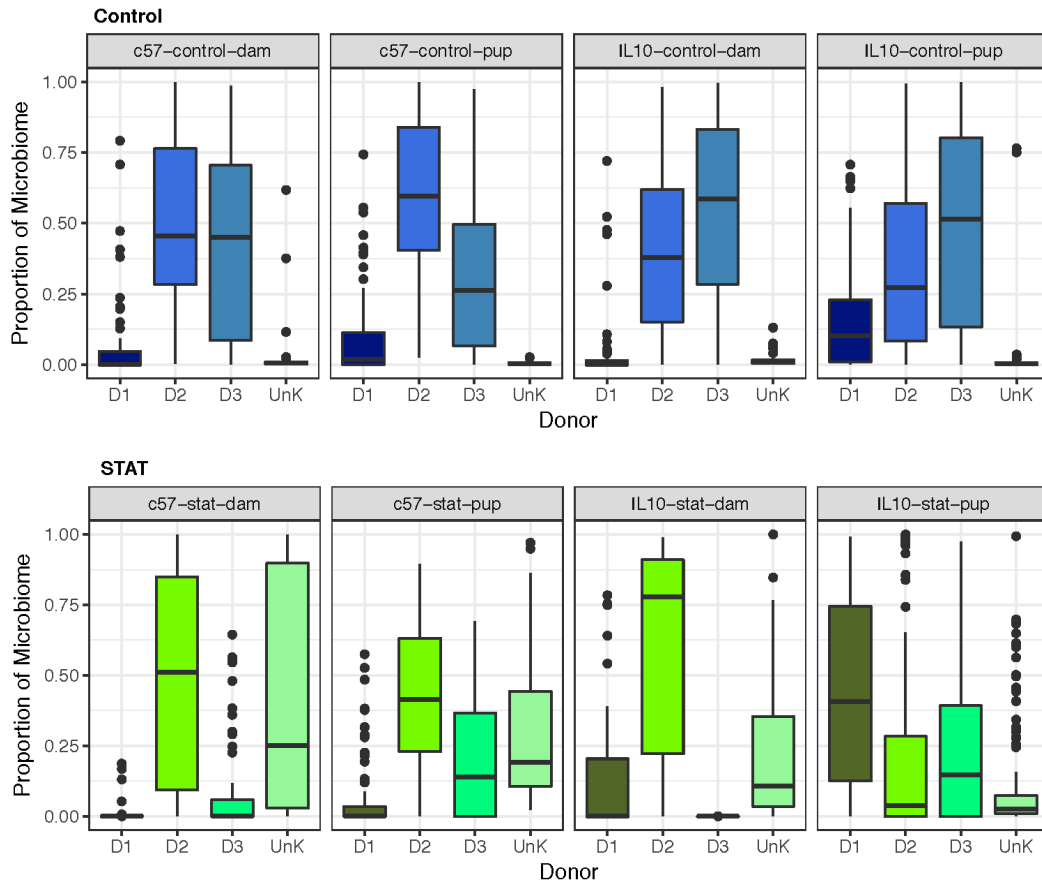

**Supplementary Figure 11. Source Tracking of the donor microbiota into recipient dams and pups.** Each inoculum was comprised of cecal contents from three donor mice. Using the Source Tracker algorithm with machine learning<sup>64</sup>, we could assign ancestry of each genus in the recipient groups of dams and pups to a single donor mouse (D1-D3), with a variable extent of non-resolution (unknown, UnK). The imputed sources are shown for the introduced taxa from the Control inoculum (**top panel**) and STAT inoculum (**bottom panel**). Boxplots depict the first quartile, median, and third quartile +/- 1.5 times the interquartile range. Outliers are depicted as black dots. Top panel: n= 100 WT control dams, 70 WT control pups, 50 IL10<sup>-/-</sup> control dams, 180 IL10<sup>-/-</sup> control pups. Bottom panel: n= 59 WT STAT dams, 74 WT STAT pups, 50 IL10<sup>-/-</sup> STAT dams, 135 IL10<sup>-/-</sup> STAT pups.



# Supplementary Tables

## Supplementary Table 1. Adonis P values of group pairs across time ( $\beta$ -diversity)

### All comparisons with the original inoculum

| Group 1              | Group 2              | Time                 | n                   | R <sup>2</sup>      | Padj  |
|----------------------|----------------------|----------------------|---------------------|---------------------|-------|
| Control Inoculum     | STAT Inoculum        | 0                    | 8                   | 0.61                | 0.032 |
|                      | WT Control dams      |                      | 11                  | 0.68                | 0.004 |
| Control Inoculum     | IL10-/- Control dams | 1 day post-gavage    | 9                   | 0.75                | 0.008 |
|                      | WT STAT dams         |                      | 10                  | 0.53                | 0.010 |
|                      | IL10-/- STAT dams    |                      | 9                   | 0.57                | 0.011 |
|                      | WT Control dams      |                      | 11                  | 0.70                | 0.005 |
| STAT Inoculum        | IL10-/- Control dams | 1 day post-gavage    | 9                   | 0.80                | 0.010 |
|                      | WT STAT dams         |                      | 10                  | 0.54                | 0.012 |
|                      | IL10-/- STAT dams    |                      | 9                   | 0.59                | 0.010 |
|                      | WT Control dams      |                      | 11                  | 0.62                | 0.008 |
| Control Inoculum     | IL10-/- Control dams | 2 days post-gavage   | 9                   | 0.55                | 0.008 |
|                      | WT STAT dams         |                      | 10                  | 0.52                | 0.005 |
|                      | IL10-/- STAT dams    |                      | 9                   | 0.54                | 0.009 |
|                      | WT Control dams      |                      | 11                  | 0.68                | 0.005 |
| STAT Inoculum        | IL10-/- Control dams | 2 days post-gavage   | 9                   | 0.66                | 0.014 |
|                      | WT STAT dams         |                      | 10                  | 0.53                | 0.008 |
|                      | IL10-/- STAT dams    |                      | 9                   | 0.50                | 0.008 |
|                      | WT Control dams      |                      | 11                  | 0.37                | 0.003 |
| Control Inoculum     | IL10-/- Control dams | 4 days post-gavage   | 9                   | 0.51                | 0.007 |
|                      | WT STAT dams         |                      | 10                  | 0.48                | 0.007 |
|                      | IL10-/- STAT dams    |                      | 9                   | 0.50                | 0.012 |
|                      | WT Control dams      |                      | 11                  | 0.49                | 0.007 |
| STAT Inoculum        | IL10-/- Control dams | 4 days post-gavage   | 9                   | 0.65                | 0.014 |
|                      | WT STAT dams         |                      | 10                  | 0.47                | 0.008 |
|                      | IL10-/- STAT dams    |                      | 9                   | 0.40                | 0.009 |
|                      | WT Control dams      |                      | 11                  | 0.36                | 0.008 |
| Control Inoculum     | WT Control pups      | 4 weeks post-gavage  | 24                  | 0.25                | 0.002 |
|                      | IL10-/- Control pups |                      | 9                   | 0.51                | 0.014 |
|                      | WT STAT pups         |                      | 10                  | 0.42                | 0.010 |
|                      | IL10-/- STAT pups    |                      | 19                  | 0.38                | 0.002 |
|                      | WT STAT dams         |                      | 9                   | 0.45                | 0.008 |
|                      | IL10-/- STAT pups    |                      | 38                  | 0.12                | 0.003 |
|                      | WT Control dams      |                      | 11                  | 0.48                | 0.004 |
|                      | WT Control pups      |                      | 24                  | 0.34                | 0.002 |
|                      | IL10-/- Control dams |                      | 9                   | 0.63                | 0.014 |
|                      | WT STAT pups         |                      | 46                  | 0.16                | 0.002 |
|                      | WT STAT dams         |                      | 10                  | 0.39                | 0.006 |
|                      | IL10-/- STAT pups    |                      | 19                  | 0.38                | 0.002 |
| STAT Inoculum        | IL10-/- STAT pups    | 4 weeks post-gavage  | 9                   | 0.42                | 0.023 |
|                      | WT Control pups      |                      | 38                  | 0.09                | 0.014 |
|                      | WT Control dams      |                      | 11                  | 0.39                | 0.003 |
|                      | WT Control pups      |                      | 25                  | 0.28                | 0.002 |
|                      | IL10-/- Control dams |                      | 9                   | 0.45                | 0.005 |
|                      | IL10-/- Control pups |                      | 46                  | 0.11                | 0.002 |
|                      | WT STAT dams         |                      | 9                   | 0.47                | 0.009 |
|                      | WT STAT pups         |                      | 19                  | 0.44                | 0.002 |
|                      | IL10-/- STAT dams    |                      | 9                   | 0.45                | 0.008 |
|                      | IL10-/- STAT pups    |                      | 39                  | 0.14                | 0.002 |
|                      | WT Control dams      |                      | 11                  | 0.54                | 0.005 |
|                      | Control Inoculum     |                      | WT Control pups     | 5 weeks post-gavage | 25    |
| IL10-/- Control dams |                      | 9                    | 0.60                |                     | 0.014 |
| IL10-/- Control pups |                      | 46                   | 0.23                |                     | 0.002 |
| WT STAT dams         |                      | 9                    | 0.48                |                     | 0.006 |
| WT STAT pups         |                      | 19                   | 0.44                |                     | 0.003 |
| IL10-/- STAT dams    |                      | 9                    | 0.41                |                     | 0.014 |
| IL10-/- STAT pups    |                      | 39                   | 0.11                |                     | 0.007 |
| WT Control dams      |                      | 11                   | 0.37                |                     | 0.008 |
| WT Control pups      |                      | 24                   | 0.33                |                     | 0.002 |
| IL10-/- Control dams |                      | 9                    | 0.56                |                     | 0.008 |
| IL10-/- Control pups |                      | 46                   | 0.10                |                     | 0.002 |
| STAT Inoculum        |                      | WT STAT dams         | 5 weeks post-gavage |                     | 10    |
|                      | WT STAT pups         | 18                   |                     | 0.35                | 0.002 |
|                      | IL10-/- STAT dams    | 9                    |                     | 0.77                | 0.007 |
|                      | IL10-/- STAT pups    | 38                   |                     | 0.20                | 0.002 |
|                      | WT Control dams      | 11                   |                     | 0.49                | 0.004 |
|                      | WT Control pups      | 24                   |                     | 0.46                | 0.002 |
|                      | IL10-/- Control dams | 9                    |                     | 0.67                | 0.014 |
|                      | IL10-/- Control pups | 46                   |                     | 0.20                | 0.002 |
|                      | WT STAT dams         | 10                   |                     | 0.49                | 0.008 |
|                      | WT STAT pups         | 18                   |                     | 0.34                | 0.003 |
|                      | IL10-/- STAT dams    | 9                    |                     | 0.72                | 0.014 |
|                      | IL10-/- STAT pups    | 38                   |                     | 0.15                | 0.002 |
| Control Inoculum     | WT Control pups      | 7 weeks post-gavage  | 23                  | 0.39                | 0.002 |
|                      | IL10-/- Control pups |                      | 31                  | 0.13                | 0.002 |
|                      | WT STAT pups         |                      | 19                  | 0.32                | 0.002 |
|                      | IL10-/- STAT pups    |                      | 26                  | 0.18                | 0.004 |
|                      | WT Control pups      |                      | 23                  | 0.48                | 0.002 |
|                      | IL10-/- Control pups |                      | 31                  | 0.27                | 0.002 |
|                      | WT STAT pups         |                      | 19                  | 0.31                | 0.002 |
|                      | IL10-/- STAT pups    |                      | 26                  | 0.14                | 0.003 |
|                      | WT Control pups      |                      | 24                  | 0.33                | 0.002 |
|                      | IL10-/- Control pups |                      | 19                  | 0.23                | 0.003 |
|                      | WT STAT pups         |                      | 19                  | 0.35                | 0.002 |
|                      | IL10-/- STAT pups    |                      | 14                  | 0.31                | 0.004 |
| STAT Inoculum        | WT Control pups      | 22 weeks post-gavage | 24                  | 0.43                | 0.002 |
|                      | IL10-/- Control pups |                      | 19                  | 0.39                | 0.002 |
|                      | WT STAT pups         |                      | 19                  | 0.34                | 0.003 |
|                      | IL10-/- STAT pups    |                      | 25                  | 0.29                | 0.002 |

### All comparisons between dams-dams or dams-pups

| Group 1              | Group 2              | Time                | n  | R <sup>2</sup> | Padj  |
|----------------------|----------------------|---------------------|----|----------------|-------|
| WT Control dams      | IL10-/- Control dams | 1 day post-gavage   | 12 | 0.38           | 0.002 |
|                      | WT STAT dams         |                     | 13 | 0.27           | 0.002 |
|                      | IL10-/- STAT dams    |                     | 12 | 0.27           | 0.003 |
|                      | WT STAT dams         |                     | 10 | 0.34           | 0.010 |
| IL10-/- Control dams | WT STAT dams         | 1 day post-gavage   | 11 | 0.37           | 0.002 |
|                      | IL10-/- STAT dams    |                     | 11 | 0.17           | 0.021 |
|                      | WT STAT dams         |                     | 12 | 0.31           | 0.003 |
|                      | IL10-/- STAT dams    |                     | 13 | 0.29           | 0.004 |
| WT Control dams      | IL10-/- Control dams | 2 days post-gavage  | 12 | 0.35           | 0.003 |
|                      | WT STAT dams         |                     | 10 | 0.32           | 0.007 |
|                      | IL10-/- STAT dams    |                     | 11 | 0.40           | 0.007 |
|                      | WT STAT dams         |                     | 11 | 0.24           | 0.021 |
| IL10-/- Control dams | WT STAT dams         | 2 days post-gavage  | 12 | 0.25           | 0.003 |
|                      | IL10-/- Control dams |                     | 13 | 0.31           | 0.003 |
|                      | IL10-/- STAT dams    |                     | 12 | 0.33           | 0.003 |
|                      | WT STAT dams         |                     | 10 | 0.34           | 0.007 |
| WT Control dams      | WT STAT pups         | 4 days post-gavage  | 11 | 0.40           | 0.003 |
|                      | IL10-/- Control pups |                     | 11 | 0.28           | 0.010 |
|                      | WT Control pups      |                     | 27 | 0.05           | 0.150 |
|                      | IL10-/- Control pups |                     | 12 | 0.40           | 0.005 |
| IL10-/- Control dams | WT STAT pups         | 4 weeks post-gavage | 49 | 0.13           | 0.002 |
|                      | IL10-/- Control pups |                     | 13 | 0.30           | 0.003 |
|                      | WT STAT pups         |                     | 22 | 0.34           | 0.002 |
|                      | IL10-/- STAT pups    |                     | 12 | 0.36           | 0.003 |
| WT Control dams      | IL10-/- STAT pups    | 4 weeks post-gavage | 41 | 0.14           | 0.002 |
|                      | WT Control pups      |                     | 47 | 0.11           | 0.003 |
|                      | WT STAT pups         |                     | 25 | 0.34           | 0.002 |
|                      | IL10-/- STAT pups    |                     | 11 | 0.34           | 0.002 |
| IL10-/- Control dams | WT Control pups      | 4 weeks post-gavage | 20 | 0.38           | 0.002 |
|                      | WT STAT pups         |                     | 10 | 0.25           | 0.007 |
|                      | IL10-/- STAT pups    |                     | 39 | 0.14           | 0.002 |
|                      | WT STAT pups         |                     | 21 | 0.09           | 0.034 |
| WT STAT dams         | IL10-/- Control pups | 4 weeks post-gavage | 48 | 0.23           | 0.002 |
|                      | WT Control pups      |                     | 26 | 0.28           | 0.002 |
|                      | IL10-/- STAT pups    |                     | 11 | 0.18           | 0.026 |
|                      | IL10-/- STAT pups    |                     | 40 | 0.09           | 0.003 |
| IL10-/- STAT dams    | WT Control pups      | 4 weeks post-gavage | 39 | 0.06           | 0.045 |
|                      | WT STAT pups         |                     | 20 | 0.28           | 0.002 |
|                      | IL10-/- Control pups |                     | 47 | 0.15           | 0.002 |
|                      | WT Control pups      |                     | 25 | 0.32           | 0.002 |
| WT Control dams      | IL10-/- Control pups | 5 weeks post-gavage | 28 | 0.05           | 0.195 |
|                      | IL10-/- Control dams |                     | 12 | 0.32           | 0.003 |
|                      | IL10-/- Control pups |                     | 49 | 0.16           | 0.002 |
|                      | WT STAT dams         |                     | 12 | 0.35           | 0.002 |
| IL10-/- Control dams | WT STAT pups         | 5 weeks post-gavage | 22 | 0.39           | 0.002 |
|                      | IL10-/- STAT dams    |                     | 12 | 0.39           | 0.003 |
|                      | IL10-/- STAT pups    |                     | 42 | 0.17           | 0.002 |
|                      | WT Control pups      |                     | 47 | 0.09           | 0.002 |
| WT STAT dams         | IL10-/- Control pups | 5 weeks post-gavage | 26 | 0.28           | 0.002 |
|                      | WT STAT pups         |                     | 10 | 0.38           | 0.007 |
|                      | IL10-/- STAT pups    |                     | 20 | 0.41           | 0.002 |
|                      | IL10-/- STAT pups    |                     | 10 | 0.31           | 0.012 |
| IL10-/- STAT dams    | WT Control pups      | 7 weeks post-gavage | 40 | 0.13           | 0.002 |
|                      | WT STAT pups         |                     | 20 | 0.15           | 0.003 |
|                      | IL10-/- Control pups |                     | 47 | 0.33           | 0.002 |
|                      | WT Control pups      |                     | 26 | 0.32           | 0.002 |
| WT Control dams      | IL10-/- STAT pups    | 7 weeks post-gavage | 10 | 0.23           | 0.029 |
|                      | IL10-/- STAT pups    |                     | 40 | 0.16           | 0.002 |
|                      | IL10-/- STAT pups    |                     | 40 | 0.07           | 0.023 |
|                      | WT STAT pups         |                     | 20 | 0.31           | 0.002 |
| IL10-/- Control dams | IL10-/- Control pups | 7 weeks post-gavage | 47 | 0.26           | 0.002 |
|                      | WT Control pups      |                     | 26 | 0.36           | 0.002 |
|                      | WT Control pups      |                     | 27 | 0.07           | 0.021 |
|                      | IL10-/- Control dams |                     | 12 | 0.49           | 0.004 |
| WT Control dams      | IL10-/- Control pups | 7 weeks post-gavage | 49 | 0.15           | 0.002 |
|                      | WT STAT dams         |                     | 26 | 0.33           | 0.002 |
|                      | WT STAT pups         |                     | 34 | 0.27           | 0.002 |
|                      | IL10-/- STAT dams    |                     | 12 | 0.62           | 0.003 |
| IL10-/- Control dams | IL10-/- STAT pups    | 7 weeks post-gavage | 41 | 0.21           | 0.002 |
|                      | WT Control pups      |                     | 47 | 0.20           | 0.002 |
|                      | WT Control pups      |                     | 25 | 0.48           | 0.002 |
|                      | WT STAT dams         |                     | 11 | 0.46           | 0.003 |
| WT STAT dams         | WT STAT pups         | 7 weeks post-gavage | 19 | 0.38           | 0.002 |
|                      | IL10-/- STAT dams    |                     | 10 | 0.57           | 0.013 |
|                      | IL10-/- STAT pups    |                     | 39 | 0.27           | 0.002 |
|                      | WT STAT pups         |                     | 20 | 0.08           | 0.174 |
| IL10-/- STAT dams    | IL10-/- Control pups | 7 weeks post-gavage | 48 | 0.35           | 0.002 |
|                      | WT Control pups      |                     | 26 | 0.41           | 0.002 |
|                      | IL10-/- STAT dams    |                     | 11 | 0.48           | 0.003 |
|                      | IL10-/- STAT pups    |                     | 40 | 0.28           | 0.002 |
| WT Control pups      | IL10-/- STAT pups    | 7 weeks post-gavage | 39 | 0.26           | 0.002 |
|                      | WT STAT pups         |                     | 19 | 0.40           | 0.002 |
|                      | IL10-/- Control pups |                     | 47 | 0.36           | 0.002 |
|                      | WT Control pups      |                     | 25 | 0.60           | 0.002 |

### All comparisons between pup groups

| Group 1              | Group 2              | Time                 | n  | R <sup>2</sup> | Padj  |
|----------------------|----------------------|----------------------|----|----------------|-------|
| WT Control pups      | WT STAT pups         | 4 weeks post-gavage  | 35 | 0.38           | 0.002 |
|                      | IL10-/- Control pups |                      | 62 | 0.24           | 0.002 |
|                      | IL10-/- STAT pups    |                      | 54 | 0.24           | 0.002 |
|                      | IL10-/- STAT pups    |                      | 76 | 0.23           | 0.002 |
| IL10-/- Control pups | WT STAT pups         | 4 weeks post-gavage  | 57 | 0.41           | 0.002 |
|                      | IL10-/- STAT pups    |                      | 49 | 0.23           | 0.002 |
|                      | WT STAT pups         |                      | 36 | 0.45           | 0.002 |
|                      | IL10-/- Control pups |                      | 63 | 0.29           | 0.002 |
| WT Control pups      | WT STAT pups         | 5 weeks post-gavage  | 56 | 0.29           | 0.002 |
|                      | IL10-/- STAT pups    |                      | 77 | 0.29           | 0.002 |
|                      | IL10-/- STAT pups    |                      | 57 | 0.53           | 0.002 |
|                      | WT STAT pups         |                      | 50 | 0.30           | 0.002 |
| IL10-/- Control pups | IL10-/- STAT pups    | 5 weeks post-gavage  | 34 | 0.42           | 0.002 |
|                      | WT STAT pups         |                      | 62 | 0.25           | 0.002 |
|                      | IL10-/- Control pups |                      | 54 | 0.35           | 0.002 |
|                      | IL10-/- STAT pups    |                      | 76 | 0.30           | 0.002 |
| WT Control pups      | WT STAT pups         | 7 weeks post-gavage  | 56 | 0.43           | 0.002 |
|                      | IL10-/- STAT pups    |                      | 48 | 0.33           | 0.002 |
|                      | WT STAT pups         |                      | 34 | 0.32           | 0.002 |
|                      | IL10-/- Control pups |                      | 46 | 0.34           | 0.002 |
| IL10-/- Control pups | IL10-/- Control pups | 16 weeks post-gavage | 41 | 0.30           | 0.002 |
|                      | IL10-/- STAT pups    |                      | 49 | 0.25           | 0.002 |
|                      | WT STAT pups         |                      | 42 | 0.41           | 0.002 |
|                      | WT STAT pups         |                      | 37 | 0.23           | 0.002 |
| WT Control pups      | WT STAT pups         | 16 weeks post-gavage | 35 | 0.28           | 0.002 |
|                      | IL10-/- Control pups |                      | 35 | 0.30           | 0.002 |
|                      | IL10-/- STAT pups    |                      | 30 | 0.33           | 0.002 |
|                      | IL10-/- STAT pups    |                      | 25 | 0.27           | 0.002 |
| IL10-/- Control pups | WT STAT pups         | 22 weeks post-gavage | 30 | 0.39           | 0.002 |
|                      | IL10-/- STAT pups    |                      | 25 | 0.25           | 0.002 |
|                      | WT STAT pups         |                      | 30 | 0.39           | 0.002 |
|                      | IL10-/- STAT pups    |                      | 25 | 0.25           | 0.002 |

## Supplementary Table 2. Statistics for single unweighted UniFrac component distances

|                  |                              | PC3                          | PC2      | PC1      |                                                 |                                                 |
|------------------|------------------------------|------------------------------|----------|----------|-------------------------------------------------|-------------------------------------------------|
| Time post-gavage | Comparison                   | P Value                      | P Value  | P Value  | Statistical test                                |                                                 |
| 0                | Inoc Ctl vs Inoc STAT        | 0.0286                       | 0.8857   | 0.2      | t-test, Mann-whitney two tailed                 |                                                 |
| 1 day            | WT Ctl dams vs WT STAT dams  | 0.0015                       | 0.0084   | 0.0069   | one way anova, sidak's multiple comparison test |                                                 |
|                  | WT Ctl dams vs IL Ctl dams   | 0.0019                       | 0.0097   | < 0.0001 |                                                 |                                                 |
|                  | WT STAT dams vs IL STAT dams | > 0.9999                     | 0.4809   | 0.0722   |                                                 |                                                 |
|                  | IL Ctl dams vs IL STAT dams  | < 0.0001                     | 0.4532   | 0.0007   |                                                 |                                                 |
| 2 days           | WT Ctl dams vs WT STAT dams  | 0.0064                       | 0.9024   | 0.029    |                                                 |                                                 |
|                  | WT Ctl dams vs IL Ctl dams   | 0.427                        | 0.0016   | 0.0006   |                                                 |                                                 |
|                  | WT STAT dams vs IL STAT dams | > 0.9999                     | 0.0044   | 0.0084   |                                                 |                                                 |
|                  | IL Ctl dams vs IL STAT dams  | 0.295                        | 0.8113   | 0.0075   |                                                 |                                                 |
| 4 days           | WT Ctl dams vs WT STAT dams  | 0.0148                       | 0.9998   | < 0.0001 |                                                 |                                                 |
|                  | WT Ctl dams vs IL Ctl dams   | 0.9419                       | 0.0001   | 0.9925   |                                                 |                                                 |
|                  | WT STAT dams vs IL STAT dams | > 0.9999                     | 0.0049   | 0.0007   |                                                 |                                                 |
|                  | IL Ctl dams vs IL STAT dams  | 0.1079                       | 0.6679   | 0.4319   |                                                 |                                                 |
| 5 days           | WT Ctl dams vs WT STAT dams  | > 0.9999                     | 0.8357   | 0.0012   |                                                 | t-test, Mann-whitney two tailed                 |
| 1.5 weeks        | IL Ctl dams vs IL STAT dams  | 0.0079                       | 0.3095   | 0.0952   |                                                 | t-test, Mann-whitney two tailed                 |
| 2.5 weeks        | IL Ctl dams vs IL STAT dams  | 0.0079                       | 0.1508   | 0.0952   |                                                 | t-test, Mann-whitney two tailed                 |
| 4 weeks          | WT Ctl dams vs WT STAT dams  | < 0.0001                     | > 0.9999 | < 0.0001 |                                                 | one way anova, sidak's multiple comparison test |
|                  | WT Ctl dams vs IL Ctl dams   | 0.9998                       | < 0.0001 | 0.3029   |                                                 |                                                 |
|                  | WT STAT dams vs IL STAT dams | > 0.9999                     | < 0.0001 | 0.9276   |                                                 |                                                 |
|                  | IL Ctl dams vs IL STAT dams  | < 0.0001                     | 0.8426   | 0.8838   |                                                 |                                                 |
|                  | WT Ctl pups vs WT STAT pups  | < 0.0001                     | 0.1331   | < 0.0001 |                                                 |                                                 |
|                  | WT Ctl pups vs IL Ctl pups   | 0.689                        | < 0.0001 | 0.9883   |                                                 |                                                 |
|                  | WT STAT pups vs IL STAT pups | 0.0002                       | < 0.0001 | < 0.0001 |                                                 |                                                 |
|                  | IL Ctl pups vs IL STAT pups  | < 0.0001                     | < 0.0001 | < 0.0001 |                                                 |                                                 |
| 5 weeks          | WT Ctl dams vs WT STAT dams  | 0.0034                       | 0.9496   | < 0.0001 |                                                 |                                                 |
|                  | WT Ctl dams vs IL Ctl dams   | 0.8912                       | < 0.0001 | > 0.9999 |                                                 |                                                 |
|                  | WT STAT dams vs IL STAT dams | < 0.0001                     | < 0.0001 | 0.1499   |                                                 |                                                 |
|                  | IL Ctl dams vs IL STAT dams  | < 0.0001                     | > 0.9999 | 0.0041   |                                                 |                                                 |
|                  | WT Ctl pups vs WT STAT pups  | < 0.0001                     | 0.1566   | < 0.0001 |                                                 |                                                 |
|                  | WT Ctl pups vs IL Ctl pups   | 0.0002                       | < 0.0001 | 0.0177   |                                                 |                                                 |
|                  | WT STAT pups vs IL STAT pups | < 0.0001                     | < 0.0001 | < 0.0001 |                                                 |                                                 |
|                  | IL Ctl pups vs IL STAT pups  | < 0.0001                     | 0.0564   | < 0.0001 |                                                 |                                                 |
| 5.5 weeks        | IL Ctl dams vs IL STAT dams  | 0.0159                       | 0.2222   | 0.0317   | t-test, Mann-whitney two tailed                 |                                                 |
| 6 weeks          | WT Ctl dams vs WT STAT dams  | < 0.0001                     | 0.9958   | 0.0001   | one way anova, sidak's multiple comparison test |                                                 |
|                  | WT Ctl dams vs IL Ctl dams   | 0.1511                       | < 0.0001 | 0.9261   |                                                 |                                                 |
|                  | WT STAT dams vs IL STAT dams | 0.0012                       | < 0.0001 | 0.0125   |                                                 |                                                 |
|                  | IL Ctl dams vs IL STAT dams  | < 0.0001                     | 0.7424   | 0.8119   |                                                 |                                                 |
| 7 weeks          | WT Ctl dams vs WT STAT dams  | < 0.0001                     | > 0.9999 | < 0.0001 | one way anova, sidak's multiple comparison test |                                                 |
|                  | WT Ctl dams vs IL Ctl dams   | 0.7571                       | < 0.0001 | 0.8859   |                                                 |                                                 |
|                  | WT STAT dams vs IL STAT dams | < 0.0001                     | < 0.0001 | 0.0213   |                                                 |                                                 |
|                  | IL Ctl dams vs IL STAT dams  | < 0.0001                     | 0.6838   | 0.0568   |                                                 |                                                 |
|                  | 7 weeks                      | WT Ctl pups vs WT STAT pups  | < 0.0001 | 0.1586   | < 0.0001                                        | one way anova, sidak's multiple comparison test |
|                  |                              | WT Ctl pups vs IL Ctl pups   | < 0.0001 | < 0.0001 | 0.2681                                          |                                                 |
|                  |                              | WT STAT pups vs IL STAT pups | < 0.0001 | < 0.0001 | < 0.0001                                        |                                                 |
|                  |                              | IL Ctl pups vs IL STAT pups  | < 0.0001 | 0.0143   | < 0.0001                                        |                                                 |
| 16 weeks         | WT Ctl pups vs WT STAT pups  | < 0.0001                     | 0.4983   | < 0.0001 | one way anova, sidak's multiple comparison test |                                                 |
|                  | WT Ctl pups vs IL Ctl pups   | 0.9571                       | < 0.0001 | 0.6817   |                                                 |                                                 |
|                  | WT STAT pups vs IL STAT pups | < 0.0001                     | < 0.0001 | < 0.0001 |                                                 |                                                 |
|                  | IL Ctl pups vs IL STAT pups  | < 0.0001                     | 0.1823   | < 0.0001 |                                                 |                                                 |
| 22 weeks         | WT Ctl pups vs WT STAT pups  | < 0.0001                     | 0.2551   | < 0.0001 | one way anova, sidak's multiple comparison test |                                                 |
|                  | WT Ctl pups vs IL Ctl pups   | 0.0354                       | < 0.0001 | 0.3551   |                                                 |                                                 |
|                  | WT STAT pups vs IL STAT pups | < 0.0001                     | < 0.0001 | 0.1304   |                                                 |                                                 |
|                  | IL Ctl pups vs IL STAT pups  | < 0.0001                     | 0.969    | < 0.0001 |                                                 |                                                 |

### Supplementary Table 3. Statistics for $\alpha$ -diversity measurements

| Time post-gavage                      | Comparison                            | PD_whole_tree<br>P Value | Observed Species<br>P Value | Shannon<br>P Value | Statistical test                                |
|---------------------------------------|---------------------------------------|--------------------------|-----------------------------|--------------------|-------------------------------------------------|
| 0                                     | Inoc C vs Inoc S                      | 0.8857                   | 0.6857                      | 0.3429             | t-test, Mann-whitney two tailed                 |
| 1 day                                 | WT Ctl dams vs WT STAT dams           | > 0.9999                 | 0.0077                      | 0.0019             | one way anova, sidak's multiple comparison test |
|                                       | WT Ctl dams vs IL10-/- Ctl dams       | < 0.0001                 | 0.0015                      | 0.298              |                                                 |
|                                       | WT STAT dams vs IL10-/- STAT dams     | 0.1016                   | 0.9676                      | 0.1556             |                                                 |
|                                       | IL10-/- Ctl dams vs IL10-/- STAT dams | < 0.0001                 | < 0.0001                    | 0.0153             |                                                 |
| 2 days                                | WT Ctl dams vs WT STAT dams           | 0.2001                   | 0.5986                      | 0.1691             | one way anova, sidak's multiple comparison test |
|                                       | WT Ctl dams vs IL10-/- Ctl dams       | 0.0026                   | 0.0048                      | 0.0081             |                                                 |
|                                       | WT STAT dams vs IL10-/- STAT dams     | 0.0451                   | 0.2102                      | 0.6692             |                                                 |
|                                       | IL10-/- Ctl dams vs IL10-/- STAT dams | 0.037                    | 0.051                       | 0.0028             |                                                 |
| 4 days                                | WT Ctl dams vs WT STAT dams           | 0.0012                   | 0.0031                      | 0.0124             | one way anova, sidak's multiple comparison test |
|                                       | WT Ctl dams vs IL10-/- Ctl dams       | 0.9626                   | 0.4813                      | 0.9998             |                                                 |
|                                       | WT STAT dams vs IL10-/- STAT dams     | 0.0764                   | 0.6616                      | 0.5352             |                                                 |
|                                       | IL10-/- Ctl dams vs IL10-/- STAT dams | 0.8545                   | 0.8229                      | 0.4913             |                                                 |
| 5 days                                | WT Ctl dams vs WT STAT dams           | 0.0047                   | 0.0047                      | 0.0326             | t-test, Mann-whitney two tailed                 |
| 1.5 weeks                             | IL10-/- Ctl dams vs IL10-/- STAT dams | 0.0317                   | 0.0317                      | 0.0079             | t-test, Mann-whitney two tailed                 |
| 2.5 weeks                             | IL10-/- Ctl dams vs IL10-/- STAT dams | 0.0556                   | 0.0317                      | 0.0317             | t-test, Mann-whitney two tailed                 |
| 4 weeks                               | WT Ctl dams vs WT STAT dams           | 0.022                    | 0.1519                      | 0.2108             | one way anova, sidak's multiple comparison test |
|                                       | WT Ctl dams vs IL10-/- Ctl dams       | 0.2379                   | 0.1862                      | 0.9989             |                                                 |
|                                       | WT STAT dams vs IL10-/- STAT dams     | > 0.9999                 | 0.6902                      | 0.8979             |                                                 |
|                                       | IL10-/- Ctl dams vs IL10-/- STAT dams | 0.8037                   | 0.7224                      | 0.1186             |                                                 |
|                                       | WT Ctl pups vs WT STAT pups           | < 0.0001                 | 0.0001                      | 0.2106             | one way anova, sidak's multiple comparison test |
|                                       | WT Ctl pups vs IL10-/- Ctl pups       | 0.6991                   | 0.0237                      | 0.3457             |                                                 |
|                                       | WT STAT pups vs IL10-/- STAT pups     | 0.1564                   | 0.9995                      | 0.4574             |                                                 |
|                                       | IL10-/- Ctl pups vs IL10-/- STAT pups | 0.0022                   | 0.0155                      | 0.0189             |                                                 |
| 5 weeks                               | WT Ctl dams vs WT STAT dams           | < 0.0001                 | < 0.0001                    | 0.0011             | one way anova, sidak's multiple comparison test |
|                                       | WT Ctl dams vs IL10-/- Ctl dams       | 0.3904                   | 0.0287                      | 0.9995             |                                                 |
|                                       | WT STAT dams vs IL10-/- STAT dams     | 0.7139                   | 0.9998                      | 0.7904             |                                                 |
|                                       | IL10-/- Ctl dams vs IL10-/- STAT dams | 0.0609                   | 0.0991                      | 0.0315             |                                                 |
|                                       | WT Ctl pups vs WT STAT pups           | < 0.0001                 | < 0.0001                    | 0.0671             | one way anova, sidak's multiple comparison test |
|                                       | WT Ctl pups vs IL10-/- Ctl pups       | 0.7632                   | > 0.9999                    | 0.3984             |                                                 |
|                                       | WT STAT pups vs IL10-/- STAT pups     | 0.0002                   | 0.0797                      | 0.2861             |                                                 |
| IL10-/- Ctl pups vs IL10-/- STAT pups | 0.0003                                | 0.001                    | 0.0122                      |                    |                                                 |
| 5.5 weeks                             | IL10-/- Ctl dams vs IL10-/- STAT dams | 0.0035                   | 0.0079                      | 0.0079             | t-test, Mann-whitney two tailed                 |
| 6 weeks                               | WT Ctl dams vs WT STAT dams           | 0.0202                   | 0.042                       | 0.0008             | one way anova, sidak's multiple comparison test |
|                                       | WT Ctl dams vs IL10-/- Ctl dams       | 0.9994                   | 0.9755                      | 0.7181             |                                                 |
|                                       | WT STAT dams vs IL10-/- STAT dams     | 0.1609                   | 0.9485                      | 0.859              |                                                 |
|                                       | IL10-/- Ctl dams vs IL10-/- STAT dams | 0.8231                   | 0.4811                      | 0.1178             |                                                 |
| 7 weeks                               | WT Ctl dams vs WT STAT dams           | < 0.0001                 | < 0.0001                    | 0.0006             | one way anova, sidak's multiple comparison test |
|                                       | WT Ctl dams vs IL10-/- Ctl dams       | 0.0529                   | 0.0011                      | 0.407              |                                                 |
|                                       | WT STAT dams vs IL10-/- STAT dams     | 0.245                    | 0.9937                      | 0.8842             |                                                 |
|                                       | IL10-/- Ctl dams vs IL10-/- STAT dams | 0.5077                   | 0.3651                      | 0.0109             |                                                 |
|                                       | WT Ctl pups vs WT STAT pups           | 0.0076                   | 0.7981                      | 0.9956             | one way anova, sidak's multiple comparison test |
|                                       | WT Ctl pups vs IL10-/- Ctl pups       | 0.0002                   | 0.0009                      | 0.0729             |                                                 |
|                                       | WT STAT pups vs IL10-/- STAT pups     | < 0.0001                 | 0.0072                      | 0.7214             |                                                 |
|                                       | IL10-/- Ctl pups vs IL10-/- STAT pups | 0.1179                   | 0.3903                      | 0.2698             |                                                 |
| 16 weeks                              | WT Ctl pups vs WT STAT pups           | 0.064                    | 0.7525                      | 0.992              | one way anova, sidak's multiple comparison test |
|                                       | WT Ctl pups vs IL10-/- Ctl pups       | 0.3065                   | 0.6673                      | 0.6853             |                                                 |
|                                       | WT STAT pups vs IL10-/- STAT pups     | 0.322                    | 0.999                       | 0.0368             |                                                 |
|                                       | IL10-/- Ctl pups vs IL10-/- STAT pups | 0.0241                   | 0.0993                      | 0.0793             |                                                 |
| 22 weeks                              | WT Ctl pups vs WT STAT pups           | 0.8867                   | > 0.9999                    | 0.0929             | one way anova, sidak's multiple comparison test |
|                                       | WT Ctl pups vs IL10-/- Ctl pups       | 0.6053                   | 0.7759                      | 0.0022             |                                                 |
|                                       | WT STAT pups vs IL10-/- STAT pups     | 0.6853                   | 0.3637                      | 0.0056             |                                                 |
|                                       | IL10-/- Ctl pups vs IL10-/- STAT pups | 0.0159                   | 0.0616                      | 0.0001             |                                                 |

**Supplementary Table 4. Statistics for mean consecutive pairwise Jaccard distances**

|      | <b>Comparison</b>                                   | <b>P value</b> |
|------|-----------------------------------------------------|----------------|
| Dams | WT Ctl vs WT STAT                                   | 0.0012         |
|      | IL10 <sup>-/-</sup> Ctl vs IL10 <sup>-/-</sup> STAT | >0.9999        |
|      | WT Ctl vs IL10 <sup>-/-</sup> Ctl                   | 0.2733         |
|      | WT STAT vs IL10 <sup>-/-</sup> STAT                 | >0.9999        |
| Pups | WT Ctl vs WT STAT                                   | 0.0054         |
|      | IL10 <sup>-/-</sup> Ctl vs IL10 <sup>-/-</sup> STAT | 0.0003         |
|      | WT Ctl vs IL10 <sup>-/-</sup> Ctl                   | 0.3609         |
|      | WT STAT vs IL10 <sup>-/-</sup> STAT                 | 0.8726         |

**Supplementary Table 5. Statistics for colonic inflammation metrics**

| Test         | Time    | Group 1                  | Group 2                     | P value                     |
|--------------|---------|--------------------------|-----------------------------|-----------------------------|
| HAI          | Week 6  | IL10 <sup>-/-</sup> STAT | IL10 <sup>-/-</sup> Control | 0.2187                      |
|              | Week 14 |                          |                             | 0.8767                      |
|              | Week 21 | WT Control               | WT STAT                     | >0.9999                     |
|              |         |                          |                             | IL10 <sup>-/-</sup> Control |
|              |         | IL10 <sup>-/-</sup> STAT | IL10 <sup>-/-</sup> Control |                             |
|              |         |                          |                             | WT STAT                     |
| Calprotectin | Week 7  | WT Control               | WT STAT                     | 0.9998                      |
|              |         |                          | IL10 <sup>-/-</sup> Control | 0.0736                      |
|              |         | IL10 <sup>-/-</sup> STAT | IL10 <sup>-/-</sup> Control | 0.0016                      |
|              |         |                          | WT STAT                     | 0.3268                      |
|              | Week 14 | WT Control               | WT STAT                     | >0.9999                     |
|              |         |                          | IL10 <sup>-/-</sup> Control | 0.1342                      |
|              |         | IL10 <sup>-/-</sup> STAT | IL10 <sup>-/-</sup> Control | <0.0001                     |
|              |         |                          | WT STAT                     | <0.0001                     |
|              | Week 19 | WT Control               | WT STAT                     | >0.9999                     |
|              |         |                          | IL10 <sup>-/-</sup> Control | 0.9953                      |
|              |         | IL10 <sup>-/-</sup> STAT | IL10 <sup>-/-</sup> Control | 0.0038                      |
|              |         |                          | WT STAT                     | 0.0020                      |
| Lipocalin-2  | Week 7  | WT Control               | WT STAT                     | >0.9999                     |
|              |         |                          | IL10 <sup>-/-</sup> Control | 0.1988                      |
|              |         | IL10 <sup>-/-</sup> STAT | IL10 <sup>-/-</sup> Control | 0.3184                      |
|              |         |                          | WT STAT                     | 0.0050                      |
|              | Week 14 | WT Control               | WT STAT                     | >0.9999                     |
|              |         |                          | IL10 <sup>-/-</sup> Control | 0.8539                      |
|              |         | IL10 <sup>-/-</sup> STAT | IL10 <sup>-/-</sup> Control | 0.2316                      |
|              |         |                          | WT STAT                     | 0.0429                      |
|              | Week 19 | WT Control               | WT STAT                     | >0.9999                     |
|              |         |                          | IL10 <sup>-/-</sup> Control | 0.5927                      |
|              |         | IL10 <sup>-/-</sup> STAT | IL10 <sup>-/-</sup> Control | 0.0223                      |
|              |         |                          | WT STAT                     | 0.0012                      |
| TNF $\alpha$ | Week 21 | IL10 <sup>-/-</sup> STAT | IL10 <sup>-/-</sup> Control | 0.7613                      |
| IFN $\gamma$ | Week 21 | IL10 <sup>-/-</sup> STAT | IL10 <sup>-/-</sup> Control | 0.0311                      |

**Supplementary Table 6. Statistics for differentially expressed genes in IL10<sup>-/-</sup> pup colon (Control vs STAT)**

| <b>Gene</b> | <b>P value (FDR-corrected)</b> |
|-------------|--------------------------------|
| Ifit2       | 0.0463                         |
| Il13ra1     | 0.0538                         |
| Blnk        | 0.0705                         |
| Nox1        | 0.0996                         |
| Hif1a       | 0.0778                         |
| Lif         | 0.0631                         |
| Il1rn       | 0.0631                         |
| Irf7        | 0.0251                         |
| Tnfaip3     | 0.0536                         |
| Ccl25       | 0.0224                         |
| Cfd         | 0.0833                         |
| Dpp4        | 0.0108                         |
| Maf         | 0.0116                         |
| Il6ra       | 0.0705                         |
| Masp2       | 0.0154                         |
| Tbx21       | 1.22E-06                       |
| Il2         | 0.0022                         |
| Cxcl12      | 0.0108                         |
| Cd109       | 0.0538                         |
| Cd163       | 0.0011                         |
| Il18        | 0.0631                         |
| Ccr8        | 0.0173                         |
| Cd36        | 0.0022                         |

**Supplementary Table 7. Statistics for percent shared OTUs**

| Time post-gavage | Group 1                  | Group 2                               | P value (dams) | P value (pups) |
|------------------|--------------------------|---------------------------------------|----------------|----------------|
| 1 day            | Control (both genotypes) | STAT (both genotypes)                 | 0.3458         | -----          |
|                  | WT (both treatments)     | IL10 <sup>-/-</sup> (both treatments) | 0.0176         | -----          |
| 2 days           | Control (both genotypes) | STAT (both genotypes)                 | 0.0037         | -----          |
|                  | WT (both treatments)     | IL10 <sup>-/-</sup> (both treatments) | 0.0366         | -----          |
| 4 days           | Control (both genotypes) | STAT (both genotypes)                 | 0.0661         | -----          |
|                  | WT (both treatments)     | IL10 <sup>-/-</sup> (both treatments) | 0.0007         | -----          |
| 4 weeks          | Control (both genotypes) | STAT (both genotypes)                 | 0.2688         | 0.0017         |
|                  | WT (both treatments)     | IL10 <sup>-/-</sup> (both treatments) | 0.0018         | 2.45E-06       |
| 5 weeks          | Control (both genotypes) | STAT (both genotypes)                 | 0.8732         | 2.50E-05       |
|                  | WT (both treatments)     | IL10 <sup>-/-</sup> (both treatments) | 1.71E-07       | 4.37E-11       |
| 6 weeks          | Control (both genotypes) | STAT (both genotypes)                 | 0.5108         | -----          |
|                  | WT (both treatments)     | IL10 <sup>-/-</sup> (both treatments) | 0.0068         | -----          |
| 7 weeks          | Control (both genotypes) | STAT (both genotypes)                 | 0.8567         | 4.08E-07       |
|                  | WT (both treatments)     | IL10 <sup>-/-</sup> (both treatments) | 1.68E-05       | 1.02E-06       |
| 16 weeks         | Control (both genotypes) | STAT (both genotypes)                 | -----          | 0.0002         |
|                  | WT (both treatments)     | IL10 <sup>-/-</sup> (both treatments) | -----          | 3.25E-06       |
| 22 weeks         | Control (both genotypes) | STAT (both genotypes)                 | -----          | 0.015          |
|                  | WT (both treatments)     | IL10 <sup>-/-</sup> (both treatments) | -----          | 4.64E-08       |

| Time post-gavage | Group 1                  | Group 2                     | P value (dam:pup ratio) |
|------------------|--------------------------|-----------------------------|-------------------------|
| 4 weeks          | WT Control               | WT STAT                     | 0.0002                  |
|                  |                          | IL10 <sup>-/-</sup> Control | 0.0635                  |
|                  | IL10 <sup>-/-</sup> STAT | IL10 <sup>-/-</sup> Control | 0.3164                  |
|                  |                          | WT STAT                     | 0.0002                  |
| 5 weeks          | WT Control               | WT STAT                     | 0.0596                  |
|                  |                          | IL10 <sup>-/-</sup> Control | 0.3562                  |
|                  | IL10 <sup>-/-</sup> STAT | IL10 <sup>-/-</sup> Control | 0.3264                  |
|                  |                          | WT STAT                     | 0.0002                  |
| 7 weeks          | WT Control               | WT STAT                     | 0.0084                  |
|                  |                          | IL10 <sup>-/-</sup> Control | 0.4875                  |
|                  | IL10 <sup>-/-</sup> STAT | IL10 <sup>-/-</sup> Control | 0.0635                  |
|                  |                          | WT STAT                     | 0.0077                  |
| 16 weeks         | WT Control               | WT STAT                     | 0.0127                  |
|                  |                          | IL10 <sup>-/-</sup> Control | 0.6948                  |
|                  | IL10 <sup>-/-</sup> STAT | IL10 <sup>-/-</sup> Control | 0.6277                  |
|                  |                          | WT STAT                     | 0.1420                  |
| 22 weeks         | WT Control               | WT STAT                     | 0.8028                  |
|                  |                          | IL10 <sup>-/-</sup> Control | 0.6558                  |
|                  | IL10 <sup>-/-</sup> STAT | IL10 <sup>-/-</sup> Control | 0.0045                  |
|                  |                          | WT STAT                     | 0.0088                  |

**Supplementary Table 8. Statistics for g\_ *Akkermansia* relative abundance**

|              | <b>Group</b>             | <b>P value</b> |
|--------------|--------------------------|----------------|
| Inoculum     | Ctl vs STAT              | 0.0286         |
| Dams vs pups | WT Ctl                   | 0.0889         |
|              | WT STAT                  | 0.0001         |
|              | IL10 <sup>-/-</sup> Ctl  | 0.0005         |
|              | IL10 <sup>-/-</sup> STAT | 0.0160         |



**Supplementary Table 9. Statistics for median Jaccard index**

|                  | <b>Comparison</b>                                   | <b>P value</b> |
|------------------|-----------------------------------------------------|----------------|
| Inoculum vs. Pup | WT Ctl vs WT STAT                                   | 3.70E-09       |
|                  | IL10 <sup>-/-</sup> Ctl vs IL10 <sup>-/-</sup> STAT | 8.70E-06       |
|                  | WT Ctl vs IL10 <sup>-/-</sup> Ctl                   | 0.2            |
|                  | WT STAT vs IL10 <sup>-/-</sup> STAT                 | 8.70E-06       |
| Inoculum vs. Dam | WT Ctl vs WT STAT                                   | 1.90E-06       |
|                  | IL10 <sup>-/-</sup> Ctl vs IL10 <sup>-/-</sup> STAT | 4.70E-02       |
|                  | WT Ctl vs IL10 <sup>-/-</sup> Ctl                   | 0.744          |
|                  | WT STAT vs IL10 <sup>-/-</sup> STAT                 | 2.70E-06       |
| Dam vs. Dam      | WT Ctl vs WT STAT                                   | 1.90E-06       |
|                  | IL10 <sup>-/-</sup> Ctl vs IL10 <sup>-/-</sup> STAT | 4.40E-05       |
|                  | WT Ctl vs IL10 <sup>-/-</sup> Ctl                   | 2.20E-05       |
|                  | WT STAT vs IL10 <sup>-/-</sup> STAT                 | 6.10E-05       |
| Dam vs. Pup      | WT Ctl vs WT STAT                                   | 3.00E-08       |
|                  | IL10 <sup>-/-</sup> Ctl vs IL10 <sup>-/-</sup> STAT | 6.70E-10       |
|                  | WT Ctl vs IL10 <sup>-/-</sup> Ctl                   | 4.40E-08       |
|                  | WT STAT vs IL10 <sup>-/-</sup> STAT                 | 2.00E-04       |
| Pup vs. Pup      | WT Ctl vs WT STAT                                   | 2.10E-05       |
|                  | IL10 <sup>-/-</sup> Ctl vs IL10 <sup>-/-</sup> STAT | 8.53E-01       |
|                  | WT Ctl vs IL10 <sup>-/-</sup> Ctl                   | 0.00031        |
|                  | WT STAT vs IL10 <sup>-/-</sup> STAT                 | 9.83E-01       |

**Supplementary Table 10. Statistics for litter and mouse variation over time**

|     | <b>Time</b>                         | <b>Group 1</b> | <b>Group 2</b>  | <b>P value</b> |
|-----|-------------------------------------|----------------|-----------------|----------------|
| Dam | 1 day post-gavage                   | WT Control     | WT STAT         | 5.23E-04       |
|     |                                     |                | IL10-/- Control | 6.67E-04       |
|     |                                     | IL10-/- STAT   | IL10-/- Control | 1.11E-06       |
|     |                                     |                | WT STAT         | 0.332          |
|     | Pup day 21<br>(4 weeks post-gavage) | WT Control     | WT STAT         | 6.35E-07       |
|     |                                     |                | IL10-/- Control | 0.482          |
|     |                                     | IL10-/- STAT   | IL10-/- Control | 5.95E-4        |
|     |                                     |                | WT STAT         | 0.198          |
|     | Pup week 6<br>(7 weeks post-gavage) | WT Control     | WT STAT         | 9.00E-7        |
|     |                                     |                | IL10-/- Control | 1.11E-5        |
|     |                                     | IL10-/- STAT   | IL10-/- Control | 0.0709         |
|     |                                     |                | WT STAT         | 1.26E-11       |
| Pup | Pup day 21                          | WT Control     | WT STAT         | 1.755E-12      |
|     |                                     |                | IL10-/- Control | 0.96           |
|     |                                     | IL10-/- STAT   | IL10-/- Control | 8.03E-44       |
|     |                                     |                | WT STAT         | 0.229          |
|     | Pup week 6                          | WT Control     | WT STAT         | 6.79E-16       |
|     |                                     |                | IL10-/- Control | 0.259          |
|     |                                     | IL10-/- STAT   | IL10-/- Control | 1.02E-17       |
|     |                                     |                | WT STAT         | 5.27E-10       |
|     | Pup week 21                         | WT Control     | WT STAT         | 7.56E-21       |
|     |                                     |                | IL10-/- Control | 0.352          |
|     |                                     | IL10-/- STAT   | IL10-/- Control | 1.45E-11       |
|     |                                     |                | WT STAT         | 0.213          |
| Dam | All samples per animal              | WT Control     | WT STAT         | 5.56E-3        |
|     |                                     |                | IL10-/- Control | 0.0413         |
|     |                                     | IL10-/- STAT   | IL10-/- Control | 0.0166         |
|     |                                     |                | WT STAT         | 0.143          |
| Pup | All samples per animal              | WT Control     | WT STAT         | 2.4E-6         |
|     |                                     |                | IL10-/- Control | 0.981          |
|     |                                     | IL10-/- STAT   | IL10-/- Control | 1.35E-03       |
|     |                                     |                | WT STAT         | 0.0351         |

**Supplementary Table 11. Statistics for weight and body composition over time**

| <b>Weeks post-gavage</b> | <b>Comparison</b>               | <b>Sex</b> | <b>P value (weight)</b> | <b>P value (BMD)</b> | <b>P value (BMC)</b> | <b>P value (FTM)</b> | <b>P value (LTM)</b> |
|--------------------------|---------------------------------|------------|-------------------------|----------------------|----------------------|----------------------|----------------------|
| 5                        | WT Control vs WT STAT           | Male       | 0.4344                  | 0.4618               | 0.1823               | 0.2428               | 0.2110               |
|                          |                                 | Female     | 0.2428                  | 0.3676               | 0.2635               | 0.2198               | 0.1471               |
|                          | IL10-/- Control vs IL10-/- STAT | Male       | 0.3418                  | 0.8367               | 0.9747               | 0.3664               | 0.4661               |
|                          |                                 | Female     | 0.2291                  | 0.7081               | 0.7283               | 0.5838               | 0.3034               |
| 9                        | WT Control vs WT STAT           | Male       | 0.5890                  | 0.7344               | 0.4967               | 0.2775               | 0.6038               |
|                          |                                 | Female     | 0.1101                  | 0.3001               | 0.0727               | 0.2198               | 0.2635               |
|                          | IL10-/- Control vs IL10-/- STAT | Male       | 0.5547                  | 0.7436               | 0.5316               | 0.1495               | 0.6833               |
|                          |                                 | Female     | 0.5834                  | 0.1149               | 0.1725               | 0.5409               | 0.8508               |
| 13                       | WT Control vs WT STAT           | Male       | 0.4587                  | 0.8577               | 0.5490               | 0.4967               | 0.4967               |
|                          |                                 | Female     | 0.0931                  | 0.3312               | 0.5887               | 0.1320               | 0.3939               |
|                          | IL10-/- Control vs IL10-/- STAT | Male       | 0.7364                  | 0.3687               | 0.1295               | 0.7648               | 0.2648               |
|                          |                                 | Female     | 0.9740                  | 0.8691               | 0.0482               | 0.8508               | 0.4239               |
| 17/18                    | WT Control vs WT STAT           | Male       | 0.1564                  | 0.2871               | 0.7197               | 0.1333               | 0.7197               |
|                          |                                 | Female     | 0.1471                  | 0.8971               | 0.3132               | 0.5622               | 0.1471               |
|                          | IL10-/- Control vs IL10-/- STAT | Male       | 0.4589                  | 0.4848               | 0.9372               | 0.5887               | 1.0000               |
|                          |                                 | Female     | 0.0629                  | 0.6993               | 0.0829               | 0.7972               | 0.0120               |
| 21                       | WT Control vs WT STAT           | Male       | 0.0205                  | 0.6461               | 0.3154               | 0.2428               | 0.2428               |
|                          |                                 | Female     | 0.0328                  | 0.8540               | 0.6354               | 0.0559               | 0.0879               |
|                          | IL10-/- Control vs IL10-/- STAT | Male       | 0.8182                  | 0.9372               | 0.8182               | 1.0000               | 0.8182               |
|                          |                                 | Female     | 0.0070                  | 0.6882               | 0.0190               | 0.6993               | 0.0070               |

**Supplementary Table 12. Statistics for differentially expressed genes in pup colon (WT vs IL10-/-)**

| Gene     | P value (FDR-corrected) |
|----------|-------------------------|
| Tnf      | 5.31E-19                |
| Fcgr4    | 1.28E-16                |
| Ccl2     | 1.36E-16                |
| Tmem173  | 3.44E-15                |
| Hif1a    | 4.04E-17                |
| Clec4e   | 7.22E-09                |
| Tnfrsf1b | 4.05E-20                |
| Tnfaip3  | 8.53E-14                |
| Cybb     | 2.45E-19                |
| Itgal    | 7.63E-23                |
| Icam1    | 2.28E-14                |
| Fcgr2b   | 2.67E-15                |
| Lilrb4   | 2.79E-15                |
| H2-Aa    | 7.63E-29                |
| Cd74     | 2.74E-63                |
| H2-Ab1   | 2.92E-51                |
| Ciita    | 1.90E-28                |
| H2-DMa   | 1.07E-27                |
| Ccl8     | 1.09E-19                |
| H2-Eb1   | 2.56E-15                |
| Gzma     | 2.10E-17                |
| Ccl5     | 6.33E-14                |
| Psmb9    | 2.84E-23                |
| Irgm1    | 7.49E-14                |
| Cd274    | 9.42E-13                |

| Gene    | P value (FDR-corrected) |
|---------|-------------------------|
| Ifit2   | 1.87E-44                |
| C2      | 2.39E-29                |
| Tap1    | 1.70E-40                |
| Stat1   | 5.08E-28                |
| Cxcl9   | 2.21E-63                |
| Cxcl10  | 9.37E-27                |
| Nos2    | 5.35E-43                |
| Nox1    | 4.54E-90                |
| Pla2g2a | 3.88E-44                |
| Dpp4    | 4.00E-13                |
| Cd36    | 2.39E-17                |
| Tnfsf12 | 5.92E-13                |
| Cd163   | 6.61E-21                |
| Cd109   | 9.78E-25                |
| Cd34    | 2.00E-12                |
| Abcb1a  | 4.37E-15                |
| Cd24a   | 2.00E-15                |
| Ccr11   | 1.42E-34                |
| Cd81    | 1.20E-13                |
| Il17rb  | 4.02E-16                |
| Il17re  | 2.70E-15                |
| Bcap31  | 1.71E-12                |
| Il15    | 8.08E-18                |
| Btnl1   | 4.17E-13                |
| Fcgrt   | 5.08E-13                |

## Supplementary Notes

### OTU Transfer

An advantage of pooling donor samples to create a single inoculum for each treatment group is that we could track which bacteria from each original donor mouse colonized both genotypes of mice. Using SourceTracking<sup>64</sup>, we provide evidence that all three donor mice contributed genera to the communities colonizing each group of pups and dams with only a single exception in which only two donors were identified.

(**Supplementary Figure 11**). In general, for the Control inoculum, the source for nearly all genera could be identified, whereas for the STAT inoculum, there was somewhat less identification by source donor, reflecting in part the extensive intragroup variation in the recipients of the STAT inoculum (**Supplementary Figure 11**).

We hypothesized that there would be a bottleneck with the transfer of the inoculum to the new hosts, and the figures showing  $\alpha$ -diversity (**Supplementary Figure 3b-d**) clearly indicate that for the dams. This is shown as a loss of richness (PD and Observed Species) and of evenness (Shannon Index). All of the data are constrained by a finite sequencing depth; with loss of evenness, dominant taxa are crowding out the less abundant ones. Over time, evenness is restored and the previously less abundant organisms apparently bloom and are more detectable. In particular, in the dams that received the STAT inocula, there is dominance by a single taxon *Akkermansia* (Verrucomicrobiae) with a mean abundance of  $34.5 \pm 34.1\%$ . Interestingly, in 3 of 4 comparisons, *Akkermansia* was significantly more dominant in the dams than in the pups (**Supplementary Figure 4c**).

### Metagenomic Pathways

We identified a single pathway that was significantly enriched in the STAT-recipient pups in relation to the Control-recipients in the IL10<sup>-/-</sup> background (**Supplementary Figure 7**). This pathway also was significantly enriched in the IL10<sup>-/-</sup> STAT mice compared to the WT STAT mice, further indicating that this pathway is associated with the mice with the most severe disease. Upon inspection, this pathway was found to only have increased abundance in the IL10<sup>-/-</sup> STAT mice and in the STAT inoculum, suggesting it may have originated in the donor material that the dams received. The pathway is SO4ASSIM-PWY or Sulfate Reduction I (**Supplementary Figure 7, panel a**), which is involved in the reduction of sulfate into hydrogen sulfide. The literature indicates that H<sub>2</sub>S can cause colonic dysfunction.<sup>30</sup> We also found that *Akkermansia muciniphila* was the only taxon significantly contributing to the Sulfate Reduction pathway in our model (**panel b**). In genomic studies, *Akkermansia* has been shown to contain the glycosulfatases needed to contribute to the pathway.<sup>31</sup> This finding is consistent with the taxonomic studies, based on 16S analyses, that show the high abundance of Verrucomicrobiae in the inoculum (**Supplementary Figure 1a**), and in the STAT compared to Control dams and pups, especially in the IL10<sup>-/-</sup> background (**Supplementary Figure 4c**). In an analysis of the taxa associated with the IL10<sup>-/-</sup> recipient pups, *Akkermansia* again was significantly increased in the STAT pups in the inoculum and at week 5 post-gavage. This work is consistent with a recent publication identifying H<sub>2</sub>S production as an important pathway in both early-onset CD in children and in an experiment mouse model.<sup>65</sup> Finally, in another experimental model in IL10<sup>-/-</sup> mice, another H<sub>2</sub>S-producing organism, *Bilophila wadsworthia*, was implicated in colitis pathogenesis.<sup>66</sup> In our experiments, *B. wadsworthia* was inversely related to disease, suggesting that it is the H<sub>2</sub>S production, rather than the specific taxon, that is the critical factor.

### **Microbiota Transfer into IL10<sup>-/-</sup> Mice**

From the LEfSe analyses, we can compare the representation of taxa from each inoculum across the two genotypes (WT and IL10<sup>-/-</sup>). Although this shows differences in relative abundances, it provides clues about the taxonomic differences. Analysis of the  $\beta$ -diversity of the dam and pup communities after inoculation shows mouse genotype-related differences along PC2, and treatment-related differences along PC3 (**Supplementary Figures 2, 3**). For both dams and pups, receipt of the antibiotic-perturbed microbiota resulted in significantly higher intra-group variability compared to controls for most time points, except for IL10<sup>-/-</sup> dams at the pup week 6 time point, as examined with t-tests (fdr-corrected) (**Supplementary Figure 5, panel a**). However, the intra-group variation among the IL10<sup>-/-</sup> mice was not greater than for the WT mice, regardless of treatment. We also tested within-animal differences (**panel b**). For both dams and pups, receipt of the antibiotic-perturbed inoculum resulted in significantly higher within-mouse variability. There were no consistent significant differences of within-mouse variability between WT and IL10<sup>-/-</sup> mice, regardless of treatment.

### **Microbiota Richness and Tissue Injury**

Next, we asked whether in this experimental model, the  $\alpha$ -diversity of the bacterial community correlated with, or could be used as a predictor of, tissue injury in the IL10<sup>-/-</sup> mice that develop colitis spontaneously. We did so because there is a growing literature that patients with IBD have lower  $\alpha$ -diversity than in healthy controls.<sup>24,50</sup> Based on a proportional odds model correcting for time and treatment, we estimated the relationship between microbiota composition and histology. The microbial richness (observed species) for samples obtained at the same time as histology had an inverse relationship with the histology score (**Supplementary Figure 9c**). An Odds Ratio (OR) of 18.0 (CI 1.4-228.7) was found for a 10-fold decrease in the observed number of species. Thus, there was an 18-fold greater chance of moving to a higher score in histology when a

sample had a 10 times lower number of observed species. This study shows a significant inverse relationship of  $\alpha$ -diversity with histological score, which is both consistent with the human data, and provides a model for future studies.

## Supplementary Discussion

### Microbial Succession

Studies of the early life development of the microbiota indicate that the dominant microbiota in the early days of life, during obligate lactation, are derived from the vaginal microbiota.<sup>67</sup> Subsequently, there is a dramatic loss in bacterial diversity resulting from lactation, followed by a shift in dominance to microbiota resembling that of the maternal gut. This nonlinear succession pattern follows the introduction of solid food coinciding with an increased diversity of anaerobes. Further reports have shown a succession of the microbiota in human children that parallels these phenomena.<sup>44,68,69</sup>

In our study, from the specimens from the WT mice, whose mothers received the Control microbiota, we observed a specific succession of decreased abundance of Firmicutes, specifically Clostridia and Bacilli, corresponding to an increase in Erysipelotrichi (**Supplementary Figure 1c**). This succession has been observed in the literature, such as a study on early microbiota perturbation in which the unperturbed microbiota of control pups showed a dramatic increase in Erysipelotrichaceae coinciding with a decrease in Clostridiaceae and Lactobacillus starting at 8 weeks of age extending through 30 weeks of ages.<sup>2</sup> The time window of these experiments align well with the succession observed in this current study. Decreasing Firmicutes and constant Bacteroidetes ratios among control pups was also observed in a recent study of murine peripartum antibiotic exposure.<sup>40</sup>



## **Antimicrobial Resistance**

An increasing body of work is providing evidence that the microbiota of laboratory-raised mice is abnormal compared to wild free-ranging mice,<sup>70-72</sup> probably due to the constraints of chow diets, trace antibiotics in the diet over generations, chlorinated water, and high dose antibiotic treatments over the generations. As such, it is not surprising that antibiotic resistance genes are present in the microbiota of the mice that inherited the 'normal' microbiota. The low dose antibiotics, by reducing bacterial richness, may have led to loss of resistance genes that were unrelated to the penicillin selection. The metagenomic analysis provides evidence for this since the major differential AR superclasses are independent of beta-lactamases, but rather involve tetracycline resistance. An alternate but related hypothesis is that in the context of one antibiotic selection, carriage of unrelated AR genes confers fitness cost to its host and is selected against, which may be particularly important in clonal species. A third observation is that when the antibiotic selection ends (as in the STAT inoculum), resistance genes have a fitness cost that is not counterbalanced by positive selection, and thus strains in the STAT inoculum with these genes are outcompeted.<sup>73-75</sup>

## Supplementary References

64. Knights, D. *et al.* Bayesian community-wide culture-independent microbial source tracking. *Nat Meth* **8**, 761–763 (2011).
65. Mottawea, W. *et al.* Altered intestinal microbiota–host mitochondria crosstalk in new onset Crohn’s disease. *Nat. Commun.* **7**, 13419 (2016).
66. Devkota, S. *et al.* Dietary-fat-induced taurocholic acid promotes pathobiont expansion and colitis in Il10<sup>-/-</sup> mice. *Nature* **487**, 104–108 (2012).
67. Pantoja-Feliciano, I. G. *et al.* Biphasic assembly of the murine intestinal microbiota during early development. *ISME J.* **7**, 1112–1115 (2013).
68. Bäckhed, F. *et al.* Dynamics and stabilization of the human gut microbiome during the first year of life. *Cell Host Microbe* **17**, 690–703 (2015).
69. Yassour, M. *et al.* Natural history of the infant gut microbiome and impact of antibiotic treatment on bacterial strain diversity and stability. *Sci. Transl. Med.* **8**, 343ra81 LP-343ra81 (2016).
70. Andersson, D. I. & Hughes, D. Microbiological effects of sublethal levels of antibiotics. *Nat Rev Micro* **12**, 465–478 (2014).
71. Weldon, L. *et al.* The gut microbiota of wild mice. *PLoS One* **10**, 1–15 (2015).
72. Kreisinger, J., Čížková, D., Vohánka, J. & Piálek, J. Gastrointestinal microbiota of wild and inbred individuals of two house mouse subspecies assessed using high-throughput parallel pyrosequencing. *Mol. Ecol.* **23**, 5048–5060 (2014).
73. Bolotin, E. & Hershberg, R. Gene loss dominates as a source of genetic variation within clonal pathogenic bacterial species. *Genome Biol. Evol.* **7**, 2173–2187 (2015).
74. Sandegren, L. & Andersson, D. I. Bacterial gene amplification: implications for the evolution of antibiotic resistance. *Nat Rev Micro* **7**, 578–588 (2009).

75. Andersson, D. I. & Hughes, D. Persistence of antibiotic resistance in bacterial populations. *FEMS Microbiol. Rev.* **35**, 901–911 (2011).
